# Supplementary material for: Land–sea coupling of Early Pleistocene glacial cycles in the southern North Sea exhibit dominant Northern Hemisphere forcing
Source: Copernicus journal article supplement (doi:10.5194/cp-2017-113), 2017-09-20
Supplement: Supplementary file 1 [file cp-2017-113-supplement.zip]

Archive with 3 entries (3 files):
- DataA15_palynology.xlsx
- DataA15Geochemistry.xlsx
- Supplementary figures and data desciptions.pdf
