# Supplementary material for: Land–sea coupling of Early Pleistocene glacial cycles in the southern North Sea exhibit dominant Northern Hemisphere forcing
Source: Copernicus journal article supplement (doi:10.5194/cp-2017-113), 2017-09-20
Supplement: Supplementary file 1 [file cp-2017-113-supplement.zip › DataA15_palynology.xlsx]

## Sheet: A15-3 %taxa
top	base	Age (spline) (Ma)	Abies #	Acer #	Alchemilla #	Alnus #	Armeria #	Artemisia #	Betula #	Botrychium #	Calluna #	Carpinus #	Carya #	Caryophyllaceae #	Celtis #	Ceratophyllum spines	Chenopodiaceae #	Cirsium #	Classopollis	Comp#Liguliflorae #	Comp#Tubuliflorae #	Corylus #	Cupressaceae #	Cyperaceae #	Dryopteris thelypteris-t#	Epilobium spec#	Equisetum #	Ericales varia	Eucommia #	Fagus #	Fraxinus	Geranium #	Gramineae #	Gramineae >40 µm	Huperzia selago	Indet	Ilex #	Juglans #	Juniperus #	Larix #	Liquidambar #	Lonicera #	Lycopodiella inundata	Lycopodium ANNOTINUM	Lycopodium inundatum	Lycopodium clavatum	Menyanthes #	Mougeotia #	Nuphar #
810	810	2.35	0	0	0	2.73973	0	0	2.05479	0	0	0	0.684932	0.684932	0	0	0	0	0	0	0	0.684932	0.684932	2.73973	18.4932	0	0	18.4932	0	0	0	0	10.274	0	0	0.684932	0	0	0	0	0	0	0	0	0	0.684932	0	0	0
814	814	2.3526	0	0	0	0	0	0	0	0	0	0	0	0	0	0	0	0	0	0	0	0	0	0	0	0	0	0	0	0	0	0	0	0	0	93.1818	0	0	0	0	0	0	0	0	0	0	0	0	0
830	830	2.3631	0	0	0	0	0	0	0	0	0	0	0	0	0	0	0	0	0	0	0	0	0	0	9.33333	0	0	5.33333	0	0	0	0	2.66667	0	0	6.66667	0	0	0	0	0	0	0	0	0	0	0	0	0
838	838	2.3684	0	0	0	0	0	0	0	0	0	0	0	0	0	0	0	0	0	0	0	0	0	0	0	0	0	0	0	0	0	0	0	0	0	100	0	0	0	0	0	0	0	0	0	0	0	0	0
850	850	2.3746	0	0	0	0.684932	0	0	0	0	0	0	1.36986	0	0	0	0	0	0	0	0.684932	0	2.05479	0.684932	10.274	0	0	30.137	0.684932	0	0	0	4.10959	0	0	0.684932	1.36986	0	0	0	0.684932	0	0	0	0	0	0	0	0
870	870	2.3808	0	0	0	4.95868	0	0	0.826446	0	0	0	2.47934	0.826446	0	0	0	0	0	1.65289	0	0.826446	0.826446	0	9.91736	0	0	23.9669	0	0.826446	0	0	5.78512	0	0	0.826446	0	0	0	0	0	0	0	0	0	0.826446	0	0	0
890.05	890.05	2.3871	0	0	0	0.190114	0	0.190114	0.190114	0.190114	0.190114	0	0.380228	0	0	0	0	0	0	0	0	0.380228	0.380228	1.3308	5.89354	0	0	12.7376	0	0.380228	0	0	1.71103	0	0	4.18251	0.95057	0	0.190114	0	0	0	0	0.190114	0	1.14068	0	0	0
890.8	890.8	2.3881	0	0	0	0	0	0	0	0	0	0	0	0	0	0	0	0	0	0	0	0	0	0	0	0	0	0	0	0	0	0	0	0	0	98.1481	0	0	0	0	0	0	0	0	0	0	0	0	0
891.75	891.75	2.3893	0.254453	0	0	0	0	0	0	0	1.52672	0	0	0.254453	0	0	0	0.254453	0	0.508906	0	0	0.254453	7.63359	9.16031	0	0.254453	5.85242	0.254453	0	0.254453	0	2.79898	0	0.254453	0	0	0	0	0.254453	0	0	0	0	0.254453	0	0	0	0
892.8	892.8	2.3907	0	0	0	0	0	0	0	0	7.32861	0	0	0.70922	0	0	0	0	0	0	0	0.236407	0.472813	4.49173	6.61939	0	0	4.01891	0	0	0	0	1.89125	0	0.236407	19.1489	0	0	0.236407	1.18203	0.472813	0	0.70922	0	0	0.945626	0	0	0
893.8	893.8	2.3921	0.733496	0	0	0	0	0	0	0	0.244499	0	0	0	0	0.244499	0	0	0	0.244499	0	0	0.244499	4.15648	11.2469	0	0	7.82396	0	0	0	0	1.46699	0	0.244499	0	0	0	0	0	0	0	0	0	0.244499	1.22249	0	0	0
894.8	894.8	2.3934	0	0	0	0.42796	0.142653	0	0	0	5.84879	0	0.142653	0.285307	0	0	0.142653	0	0	0.142653	0.285307	0.285307	0.285307	3.13837	7.98859	0	0	13.1241	0	0	0	0	2.1398	0	0.285307	0	0	0	0	0.85592	0.285307	0	0.142653	0	0	1.14123	0	0	0
895.8	895.8	2.3947	0	0	0	0	0	0	0	0	6.09137	0.253807	0.253807	0.507614	0	0	0	0	0	0	0	0	0.253807	2.53807	8.62944	0	0.253807	3.04569	0	0	0	0	1.26904	0	0	16.4975	0	0	0	0.507614	0	0	0.253807	0	0.253807	1.01523	0	0	0
896.8	896.8	2.3961	0.169779	0	0	0	0	0	0	0	0.169779	0	0	0	0	0	0	0	0.679117	0	0	0.169779	0.169779	3.73514	8.14941	0	0	3.56537	0	0	0	0	0.509338	0	0.169779	0	0	0	0	0	0.169779	0	0	0	0	0.339559	0	0	0
897.8	897.8	2.3974	0.227015	0	0	0.227015	0	0	0	0	2.72418	0.113507	0.113507	0.227015	0	0	0	0	0	0	0.113507	0.227015	0.227015	4.08627	11.5778	0	0	3.85925	0	0	0	0	0.908059	0	0	0	0	0	0	0.340522	0	0	0	0	0.113507	2.38365	0	0	0
898.8	898.8	2.3987	0.40568	0	0	0	0	0	0	0.20284	0.608519	0	0	0.20284	0	0	0.20284	0	0	0.20284	0	0.20284	0.20284	3.44828	9.73631	0	0.20284	3.85396	0	0	0	0	1.21704	0	0	0	0.20284	0	0	0	0	0	0	0	0	0.40568	0	0	0
899.35	899.35	2.3995	0.245098	0	0	0	0	0	0	0	7.10784	0	0	0	0	0	0	0	0	0.245098	0	0	0.245098	7.59804	7.35294	0	0	4.90196	0	0	0	0	2.69608	0	0	0	0	0	0	0.245098	0	0	0	0	0.245098	0.245098	0	0	0
899.8	899.8	2.4001	0.0947867	0	0	0.0947867	0	0	0	0.189573	0.379147	0.189573	0.0947867	0	0	0	0	0	0	0	0.0947867	0.189573	0.189573	3.98104	9.76303	0	0	5.6872	0	0	0	0	0.473934	0.189573	0.0947867	0	0	0	0	0	0.0947867	0	0	0.0947867	0	0.379147	0	0	0
900.8	900.8	2.4014	0.25	0.25	0	0.25	0	0	0	0	11.5	0	0.25	0	0	0	0	0.25	0	0.25	0.25	0.25	0.25	5.25	11.25	0	0.25	4.5	0	0	0	0	1.25	0	0	0	0	0	0	1	0	0	0.5	0	0.25	0.25	0.25	0	0
901.8	901.8	2.4027	0.309598	0	0	0	0.309598	0	0	0	26.6254	0	0.309598	0	0.309598	0	0.309598	0	0	0.309598	0	0	1.54799	2.16718	10.8359	0	0.309598	1.85759	0	0	0	0	0.928793	0	0	0	0	0	0	1.85759	0	0	0	0	0.619195	0.619195	0	0	0
902.8	902.8	2.4041	0	0	0	0	0	0	0	0.268097	2.41287	0.268097	0	0.268097	0	0	0	0	0	0.268097	0	0	0	2.68097	13.6729	0	0	16.3539	0	0	0	0	0.80429	0	0	0	0	0	0	0	0.268097	0	0	0	0	0.268097	0.268097	0	0
903.85	903.85	2.4055	0	0	0	0	0	0	0	0	0.970874	0	0	0.138696	0	0	0.138696	0.138696	0	0.138696	0	0	0	3.6061	11.2344	0.277393	0.138696	16.0888	0	0	0	0	1.66436	0	0	0	0	0	0	0	0	0	0	0	0	1.66436	0.138696	0.138696	0
904.43	904.43	2.4062	0	0	0	0.625	0	0	0	0	0	0	0	0.625	0	0	0	0	0	0.625	0	0	0	3.125	14.375	0	0	7.5	0	0	0	0	3.125	0	0	1.875	0.625	0	0	0	0	0	0	0	0	0	0	0	0
904.8	904.8	2.4067	0	0	0	0.589971	0	0	0	0	0.884956	0	0	0	0	0	0	0	0	0	0	0	0	4.12979	16.5192	0	0	5.01475	0	0	0	0	0.294985	0.294985	0	0	0	0	0	0	0	0	0	0	0	0.884956	0	0	0
904.8	904.8	2.4067	0.303951	0	0	0	0	0	0	0	9.42249	0.303951	0	0.303951	0	0	0	0	0	0	0	0	0.303951	3.95137	9.42249	0	0.303951	0.911854	0	0	0	0	1.82371	0	0	0	0	0	0	0.607903	0	0	0.303951	0	0.303951	1.82371	0	0	0
905.26	905.26	2.4074	0	0	0	0.314465	0	0	0	0	13.2075	0	0	0.314465	0	0	0.314465	0	0	0	0	0	0	2.83019	7.2327	0	0	1.88679	0	0	0	0	1.88679	0	0	0	0	0	0	0.628931	0	0	0.628931	0	0	2.20126	0	0	0
908	908	2.4116	0	0	0	0.699301	0	0	0.699301	0	0	0.699301	0	0	0	0	0	0	0	0.699301	0	0	0	6.29371	19.5804	0	0	9.79021	0	0	0	0	4.1958	0	0	4.1958	0.699301	0	0	1.3986	0	0	0	0	0	1.3986	0	0	0
917.55	917.55	2.4263	0	0	0	0	0	0	0	0	0.591716	0	0	0	0	0	0	0	0	0.295858	0.295858	0	2.66272	0	14.7929	0	0	0.887574	0	0	0	0	0.887574	0	0	0	0	0	0.295858	0	0	0	0	0	0	2.07101	0	0	0
918.15	918.15	2.4271	0	0	0	0	0	0	0	0	0	0	0	0.496278	0	0	0	0	0	0.744417	0	0	2.72953	0.744417	18.8586	0	0	1.98511	0	0	0	0	1.24069	0	0	11.1663	0	0	0.248139	0	0	0	0	0	0	0.744417	0	0	0
918.15	918.15	2.4271	0	0	0	0	0	0	0	0	0	0	0	0.560224	0	0	0	0	0	0.840336	0	0	3.08123	0.840336	21.2885	0	0	2.2409	0	0	0	0	1.40056	0	0	0	0	0	0.280112	0	0	0	0	0	0	0.840336	0	0	0
920	920	2.4286	0	0.178891	0	0.357782	0	0	0	0	0.357782	0	0	0	0.178891	0	0	0	0	0.715564	0	0.357782	0.178891	6.26118	10.5546	0	0	6.08229	0	0	0	0	1.07335	0	0	0	0	0	0	0	0	0	0	0.178891	0	0.178891	0	0	0
920	920	2.4286	0	0	0	0	0	0	0	0	0	0	0	0.322581	0	0	0	0	0	0.645161	0.322581	0.322581	3.54839	0.645161	10.9677	0	0	3.87097	0	0	0	0	0	0	0	0	0	0	0	0	0	0	0.322581	0	0	0.645161	0	0	0.322581
920.6	920.6	2.429	0	0.636943	0	0.636943	0	0	0	0	0	0	0.636943	0.636943	0	0	0	0	0	0	0	0	1.91083	5.09554	7.64331	0	0	15.2866	0	0	0	0	4.4586	0	0	0	0	0	0.636943	0	0	0	0	0	0	0	0	0	0
920.95	920.95	2.4293	0	0	0	0	0	0	0	0	0	0	0	0.757576	0	0	0	0	0	0.757576	0	0	0	0	9.09091	0	0	4.54545	0	0	0	0	0	0	0	0	0	0	0	0	0	0	0	0	0	0	0	0	0.757576
921.05	921.05	2.4294	0	0	0	0	0	0	0	0	0	0	0	0	0	0	0	0	0	0	0	0.746269	0.746269	0	8.20896	0	0	5.22388	0	0	0	0	0.746269	0	0	0	0	0	0	0	0	0	0	0	0	0.746269	0	0	0
921.95	921.95	2.4301	0	0	0	0	0	0	0	0	0.310559	0	0	0.310559	0	0	0	0	0	0	0.621118	0	0.621118	0.310559	7.76398	0	0	4.96894	0.621118	0	0	0	0.310559	0	0	0	0	0	0	0	0	0	0.310559	0.931677	0	0.310559	0	0	0
923	923	2.4309	0	0	0	0.338983	0	0	0	0	0	0.338983	0	0	0	0	0	0	0	0	0	0	0.677966	0.338983	3.38983	0	0	6.44068	0	0.338983	0	0	0.338983	0	0	0	0	0	0	0	0	0	0	0.677966	0	0.677966	0	0	0.338983
924	924	2.4317	0	0	0	0	0.33557	0	0	0	1.34228	0	0	0	0	0	0	0	0	0.33557	0.33557	0.33557	0.33557	0	5.03356	0	0	3.3557	0.33557	0.33557	0	0	1.00671	0	0	0	0	0	0	0	0	0	0	0.33557	0	0.671141	0	0	0.33557
924.5	924.5	2.4321	0	0	0	0	0	0	0	0	0.3367	0.3367	0	0.3367	0	0	0	0.3367	0	0.3367	0.3367	0	0	0	2.6936	0	0	3.7037	0.3367	0	0	0	0	0	0	0	0	0	0	0	0	0	0	0	0	0.673401	0	0	0
925	925	2.4325	0	0	0	0	0	0	0	0	1.38889	0	0	0	0	0	0	0	0	1.38889	0.347222	0	1.38889	0	6.59722	0	0	3.125	0	0	0	0	3.125	0	0	0	0	0	0	0	0	0	0	0	0	2.08333	0	0	0
926.55	926.55	2.4337	0	0	0	0	0	0	0	0	0.673401	0	0	0.3367	0	0	0	0	0	0.3367	0	0	0.3367	0	2.6936	0	0	2.0202	0.3367	0	0	0	0	0	0	0	0	0	0	0	0	0	0	0	0	0.3367	0	0	0
926.7	926.7	2.4338	0	0	0	0	0.341297	0	0	0	0.682594	0	0	0.341297	0	0	0	0	0	0.341297	0	0	1.36519	0	1.70648	0	0	4.09556	0	0	0	0	0	0	0	0	0	0	0	0	0	0	0	0	0	0.682594	0	0	0
927.76	927.76	2.4346	0	0	0	0	0	0	0	0	0.306748	0	0	0	0	0	0	0	0.306748	0	0	0	0.613497	0.306748	3.37423	0	0	1.22699	0	0	0	0	0.306748	0	0	0	0	0	0	0	0	0	0	0	0	1.53374	0	0	0
928.45	928.45	2.4352	0	0	0	0	0	0	0	0.239234	0.717703	0	0	0.239234	0	0	0	0	0	0	0	0	0	0	3.11005	0	0	2.39234	0	0	0	0	0	0	0	0	0	0	0	0	0	0	0	0	0	1.67464	0	0	0
928.5	928.5	2.4352	0	0	0	0	0	0	1.40845	0	0	0	1.40845	0	0	0	0	0	0	0	1.40845	0	4.22535	7.04225	2.8169	0	0	0	0	0	0	0	5.6338	0	0	4.22535	0	0	0	0	0	0	0	0	0	0	0	0	0
929.2	929.2	2.4358	0	0	0	0	0	0	0	0	0	0	0	0	0	0	0	0	0	0	0	0	0	1.47059	4.41176	0	0	1.47059	0	0	0	0	0	0	0	0	0	0	0	0	0	0	0	0	0	1.47059	0	0	0
929.95	929.95	2.4363	0	0	0	0	0	0	0	0.340136	0.340136	0	0	0.340136	0	0	0	0	0	0.340136	0.340136	0	0	0	2.72109	0	0	1.36054	0	0	0	0	0	0	0	0	0	0	0	0	0.340136	0	0.680272	0.340136	0	1.36054	0	0	0
935.9	935.9	2.441	0	0	0	0	0	0	0	0.330033	1.32013	0.330033	0	0	0	0	0	0	0	0	0.330033	0	0.660066	0	3.9604	0	0	5.28053	0.330033	0	0	0	0	0	0	0	0	0	0	0	0	0	0.330033	0.330033	0	0.660066	0	0	0.330033
936.9	936.9	2.4418	0	0	0	0	0.301205	0	0	0.301205	0.903614	0	0	0.301205	0	0	0	0	0	0.301205	0.301205	0	0.903614	0.903614	3.01205	0	0	1.80723	0.301205	0	0	0	0.60241	0	0	0	0	0	0	0	0	0	0	0.301205	0	1.80723	0	0	0
938.9	938.9	2.4433	0	0	0	0	0	0	0.338983	0.338983	0.677966	0	0	0.338983	0	0	0	0	0	0.338983	0	0	0.338983	0	5.08475	0	0	3.05085	0.338983	0	0	0	0	0	0	0	0	0	0	0	0	0	0	0.338983	0	1.01695	0	0	0
939.8	939.8	2.444	0	0	0	0	0	0	0	0	0.398406	0	0	0	0	0	0	0	0	0.398406	0	0	0	0	1.99203	0	0	3.58566	0	0	0	0	0.398406	0	0	0	0	0	0	0	0	0	0	0.398406	0	0.398406	0	0	0
940.9	940.9	2.4449	0	0	0	0	0	0	0	0	0.56338	0	0	0	0	0	0	0	0	0.28169	0	0	1.12676	0.56338	5.35211	0	0	3.09859	0	0	0	0	1.97183	0	0	0	0	0	0.56338	0	0.28169	0	0	0	0	0.84507	0	0	0
941.9	941.9	2.4457	0	0	0	0	0	0	0	0	0	0	0	0	0	0	0	0	0	0	0	0	0	0	0	0	0	0	0	0	0	0	0	0	0	100	0	0	0	0	0	0	0	0	0	0	0	0	0
942.9	942.9	2.4465	0	0	0	0	0.383142	0	0	0	0.766284	0	0	0	0	0	0	0	0	0	0.383142	0	0.383142	0	4.5977	0	0	2.68199	0	0	0	0	1.14943	0	0	0	0	0	0	0	0.383142	0	0	0	0	0.766284	0	0	0
943.85	943.85	2.4472	0	0	0	0.288184	0	0	0	0	1.72911	0	0.288184	0.288184	0	0	0	0	0	0	0.288184	0	0.864553	0	2.88184	0	0	8.93372	0.288184	0	0	0	0	0	0.288184	0	0	0	0	0	0	0	0	0.576369	0	2.88184	0	0	0
944.5	944.5	2.4477	0	0	0	0.689655	0	0	0	0	0	0.689655	0	0	0	0	0	0	0	1.37931	0.689655	0	2.75862	0.689655	6.2069	0	0	16.5517	0	0	0	0	18.6207	0	0	0	0	0	0	0	0	0	0	0	0	0	0	0	0
945.9	945.9	2.4488	0	0	0	0	0	0	0.299401	0	0	1.79641	0	0	0	0	0	0	0	0	0.299401	0.299401	0.598802	0	4.49102	0	0	9.88024	0.299401	0	0	0	0.598802	0	0	0	0	0	0	0	0	0	0	0	0	1.49701	0	0	0
946.8	946.8	2.4495	0	0	0	0.2849	0.2849	0	0.2849	0	3.1339	0	0.2849	0.2849	0	0	0	0	0	0.569801	0	0.2849	0.569801	4.2735	9.68661	0	0.569801	7.97721	0	0	0	0.2849	7.40741	0	0	2.849	0	0	0.2849	0	0	0	0.2849	0	0	0	0	0	0
946.91	946.91	2.4496	0	0	0	0	0	0	0.316456	0	0.949367	0	0	0.316456	0	0	0	0	0	0.316456	0.316456	0	0.632911	0	8.22785	0	0	6.01266	0	0	0	0	0.316456	0	0	0	0	0	0	0	0.316456	0	0	0.316456	0	1.26582	0	0	0
947.74	947.74	2.4502	0	0	0	0.327869	0	0	0.327869	0.327869	0.655738	0	0	0.327869	0	0	0	0.327869	0	0.327869	0	0.327869	0.655738	0.327869	3.93443	0	0	6.88525	0.327869	0	0	0	0	0	0	0	0	0	0	0	0.327869	0	0	0.983607	0	0.983607	0	0	0.327869
953.25	953.25	2.4574	0	0	0	0	0	0	0	0	0	0	0	0	0	0	0	0	0	0	0	0	0	0	0	0	0	0	0	0	0	0	0	0	0	100	0	0	0	0	0	0	0	0	0	0	0	0	0
954.15	954.15	2.4589	0	0	0	0	0	0	0	0	0.323625	0	0	0.323625	0	0	0	0.323625	0	0	0	0	0	0	4.53074	0	0	8.09061	0	0	0	0	0	0	0	0	0	0	0	0	0	0	0	0	0	0.647249	0	0	0
955.2	955.2	2.4607	0	0	0	0	0	0	0	0	2.06186	0	0	0	0	0	0	0	0	0.343643	0	0	0	0	6.87285	0	0	4.12371	0	0	0	0	0	0	0	0	0	0	0	0	0.343643	0	0.343643	0	0	0.687285	0	0	0
955.6	955.6	2.4613	0	0	0	0	0	0	0.75188	0	0	0	0.75188	0	0	0	0	0	0	0	0	0	2.25564	14.2857	6.76692	0	0	7.5188	0	0	0	0	21.0526	0	0	7.5188	0	0	0	0	0	0	0	0	0	0	0	0	0
956.18	956.18	2.4623	0	0	0	0	0	0	0	0	1.51515	0	0	0.30303	0	0	0	0	0	0.30303	0.30303	0	0	0	8.78788	0	0	2.12121	0	0	0	0	0	0	0	0	0	0	0	0	0	0	0	0.30303	0	1.81818	0	0	0
956.31	956.31	2.4625	0	0	0	0	0	0	0	0	1.07143	0	0	0	0	0	0	0	0	0	0.357143	0	0	0	5.35714	0	0	1.42857	0.357143	0	0	0	0	0	0	0	0	0	0	0	0	0	0	0	0	1.78571	0	0	0
957.3	957.3	2.4642	0	0	0	0	0	0	0	0	0.292398	0	0	0	0	0	0	0	0	0	0	0	0	0	7.60234	0	0	4.67836	0	0	0	0	0	0	0	0	0	0	0	0	0	0	0	0	0	1.16959	0	0	0
957.34	957.34	2.4642	0	0	0	0	0	0	0	0	0.289017	0	0	0	0	0	0	0	0	0.289017	0.289017	0.289017	0	0	9.53757	0.289017	0	4.33526	0	0	0	0	0	0	0	0	0	0	0	0	0	0	0	0.289017	0	1.7341	0	0	0
958.25	958.25	2.4658	0	0	0	0	0	0	0	0	0.687285	0	0	0.343643	0	0	0	0	0	0	0	0	0	0	6.87285	0	0	1.71821	0	0	0	0	0.343643	0	0	0	0	0	0	0	0	0	0	0.343643	0	1.03093	0	0	0
959.2	959.2	2.4673	0	0	0	0	0	0	0	0	0	0	0	0	0	0	0	0	0	0	0	0	0	0	0	0	0	0	0	0	0	0	0	0	0	96.9697	0	0	0	0	0	0	0	0	0	0	0	0	0
960.67	960.67	2.4698	0	0	0	0	0	0	0	0.263158	0.526316	0	0	0	0	0	0	0	0	0	0.263158	0	1.05263	0	10.7895	0	0	2.36842	0.526316	0	0	0	0.263158	0	0	0	0	0	0	0	0	0	0	0	0	1.05263	0	0	0
961.4	961.4	2.471	0	0	0	0	0	0	0	0	0	0	0	0	0	0	0	0	0	0	0	1.05263	0	0	3.15789	0	0	0	0	0	0	0	5.26316	0	0	5.26316	1.05263	0	0	0	0	0	0	0	0	3.15789	0	0	1.05263
961.4	961.4	2.471	0	0	0	0	0	0	0	0.275482	0.275482	0	0	0	0	0	0	0	0	0	0.275482	0	0.275482	0	10.1928	0	0	3.85675	0.826446	0	0	0	0	0	0	0	0	0	0	0	0	0	0	0	0	1.37741	0	0	0
962.2	962.2	2.4723	0	0	0	0.469484	0	0	0	0	0	0	0	0	0	0	0	0.469484	0	0	0	0	0	0	10.3286	0	0	4.69484	0.469484	0	0	0	0	0	0	0	0	0	0	0	0	0	0.469484	0	0	3.28638	0	0	0
963.17	963.17	2.474	0	0	0	0	0	0	0	0	0	0	0	0	0	0	0	0	0	0	0	0	0	0	4.65116	0	0	0.775194	0	0	0	0	0	0	0	0	0	0	0	0	0	0	0	0	0	2.32558	0	0	0
964.14	964.14	2.4756	0	0	0	0	0	0	0	0	2.7027	0	0	0	0	0	0	1.35135	0	0	0	0	0	0	12.1622	0	0	9.45946	0	0	0	0	0	0	0	0	0	0	0	0	0	0	0	0	0	1.35135	0	0	0
975	975	2.4855	0	0	0	0.684932	0	0	2.05479	0	0	0	0	0	0	0	0	0	0	0	0	0.684932	0	4.10959	9.58904	0	0	30.137	0	0	0	0	4.79452	0	0	5.47945	0	0	0	0	0	0	0	0	0	0	0	0	0
985	985	2.494	0	0	0	0.609756	0	0	0	0	0	0	0	0	0	0	0.609756	0	0	0	0	0	0	0.609756	6.09756	0	0	26.2195	0	0	0	0	2.43902	0	0	0.609756	0	0	0	0	0	0	0	0	0	0	0	0	0
990	990	2.4993	0	0	0	0.606061	0	0	0	0	0	0	0.606061	0	0	0	0.606061	0	0	0.606061	0	0.606061	1.21212	0.606061	20	0	0	15.7576	0	0	0	0	4.24242	0	0	0	0	0	0	0	0	0	0	0	0	0	0	0	0
995	995	2.5047	0	0	0	0	0	0	0	0	0	0	0	0	0	0	0	0	0	1.23457	0	0	0	0	12.3457	0	0	7.40741	0	0	0	0	0	0	0	2.46914	0	0	0	0	0	0	0	0	0	1.23457	0	0	0
1015	1015	2.5325	0	0	0	0.641026	0	0	0	0	0	0	0	0	0	0	0	0	0	0	0	1.28205	1.28205	5.12821	14.1026	0	0	17.9487	0	0	0	0	7.05128	0	0	2.5641	0	0	0	0	0	0	0	0	0	0	0	0	0
1030	1030	2.5561	0	0	0	0	0	0	0.735294	0	0	0	0.735294	0	0	0	0	0	0	0.735294	0	0	2.20588	8.08824	16.1765	0	0	16.1765	0	0	0	0	8.08824	0	0	0	0.735294	0	0	0	0	0	0	0	0	0	0	0	0
1050	1050	2.5755	0	0	0	0.645161	0	0	0	0	0	0	0	0	0	0	0	0	0	0	0.645161	0	1.29032	1.29032	7.74194	0	0	17.4194	0	0	0	0	3.87097	0	0	5.80645	0.645161	0	7.09677	0	0	0	0	0	0	0	0	0	0
1070	1070	2.58	0	0	0	2.83688	0	0.70922	0	0	0	0	0	0.70922	0	0	0.70922	0	0	0	0	0.70922	0.70922	0.70922	11.3475	0	0	9.92908	0	0	0	0	2.12766	0	0	4.25532	0.70922	0	0	0	0	0	0	0	0	0	0	0	0
[truncated: 174 more columns]

## Sheet: A15-4 %taxa
top	base	splice to 03	Age (spline) (Ma)	Abies #	Acer #	Alnus #	Armeria #	Artemisia #	Betula #	Botrychium	Calluna #	Carpinus #	Carya #	Caryophyllaceae #	Centaurea cyanus	Cirsium	Chenopodiaceae #	Comp#Liguliflorae #	Comp#Tubuliflorae #	Corylus #	Cunninghamia #	Cupressaceae #	Cyperaceae #	Deltoidospora	Dryopteris linnaeana	Dryopteris thelypteris-t#	Ericales varia	Epilobium spec#	Eucommia #	Fagus #	Fraxinus #	Galium #	Gramineae #	Ilex #	Indet #	Juglans #	Larix #	Liquidambar #	Lycopodiella inundata	Lycopodium inundatum	Lycopodium SPEC#	Mougeotia #	Myriophyllum verticilatum	Nuphar #	Nyssa #	Osmunda #	Ostrya-T# #	Ovoidites #	Pediastrum #
918.4	918.4	901.724	2.4026	0	0	1.08696	0	0	0.543478	0	0	0	0	0	0	0	0	0	0.543478	0	0	0	0	0	0	0.543478	37.5	0	0	1.08696	0	0	2.17391	0	0	0	0	0	0	0	1.63043	0	0	0	0	4.34783	0	0	0
921.95	921.95	904.784	2.4067	0	0	0	0	0	0	0	0	0	0	0	0	0	0	0	0	0	0	0	1.84049	0	0	1.84049	11.6564	0	0	0	0	0	2.76074	0	0	0	0	0	0	0	0.306748	0	0	0	0	2.45399	0	0	0
923.73	923.73	906.319	2.409	0	0	0.9375	0	0	0	0	0	0	0	0	0	0	0	0	0	0.3125	0	0.3125	7.5	0	0	9.375	6.5625	0	0	0	0	0	0.625	0	0	0	0	0	0	0.3125	1.5625	0	0	0	0	7.5	0	0	0
924.1	924.1	906.6	2.4095	0	0	0	0	0	0	0	4.23453	0	0	0	0	0	0	0	0	0	0	0.325733	2.60586	0.651466	0	8.46906	1.62866	0	0	0	0	0	0	0	0	0	0	0	0	0	1.30293	0	0	0	0	1.62866	0	0	0
924.45	924.45	906.94	2.41	0	0	0.668896	0	0	0	0	1.00334	0	0	0	0	0	0.334448	0.334448	0	0.334448	0	0	2.67559	0.334448	0	15.3846	10.0334	0	0	0	0	0	1.00334	0	0	0	0	0	0	0	0.668896	0	0	0	0	4.01338	0	0	0
924.75	924.75	907.2	2.4104	0	0	0	0.314465	0	0	0	5.03145	0	0	0	0	0	0	0	0	0	0	0.314465	6.28931	0.628931	0	9.43396	1.88679	0	0	0	0	0.314465	0.628931	0	0	0	0	0	0.314465	0	0.314465	0.314465	0	0	0	7.54717	0	0	0
925.1	925.1	907.5	2.4108	0	0	0.396825	0	0	0.396825	0	2.38095	0	0	0	0	0	0	0.396825	0	0.396825	0	0	0.396825	0.396825	0	6.74603	4.7619	0	0	0	0	0	0	0	0.793651	0	0	0	0	0	6.34921	0	0	0	0	7.93651	0	0	0.396825
925.45	925.45	907.8	2.4113	0.314465	0	0	0	0	0	0	5.34591	0	0	0.314465	0	0	0	0	0	0.314465	0	0.314465	4.08805	0.943396	0	11.9497	1.57233	0	0	0	0	0	0.314465	0	0	0	0	0	0.943396	0	0.943396	0	0	0	0	4.71698	0	0	0
926	926	908.276	2.412	0	0	0	0	0	0	0	0	0	0	0	0	0	0	0	0	0	0	0	0.46729	0	0	0.46729	10.2804	0	0	0	0	0	1.86916	0	0	0	0	0	0	0	0	0	0	0	0	6.07477	0	0	0
926.45	926.45	908.65	2.4126	0	0	0	0	0	0	0	9.00901	0	0	0	0	0	0	0.3003	0.3003	0	0	0	1.5015	0	0	12.012	1.2012	0	0	0	0	0	0.3003	0	0	0	0	0	0	0	1.5015	0	0	0	0	3.003	0	0	0
926.8	926.8	908.966	2.4131	0	0	0	0	0	1.66667	0	1.66667	0	1.66667	0	0	0	0	0	0	0	0	0	0	0	0	10	1.66667	0	0	0	0	0	0	0	0	0	0	0	0	0	3.33333	0	0	0	0	6.66667	0	0	0
927	927	909.05	2.4132	0	0	0.31746	0	0	0	0	10.4762	0.31746	0	0.31746	0	0	0	0	0.31746	0	0	0	2.22222	0	0	8.88889	1.90476	0	0	0	0	0	1.26984	0	0	0	0	0	0	0	1.5873	0	0.31746	0	0	1.90476	0	0	0
927.45	927.45	909.526	2.414	0	0	0	0	0	0	0	0.884956	0	0	0	0	0	0	0	0	0	0	0	0	1.32743	0	3.53982	12.8319	0	0	0	0	0	0	0.442478	1.32743	0	0	0	0	0	0.884956	0	0	0	0	10.6195	0	0	0
927.8	927.8	909.82	2.4144	0	0	0	0	0	0	0	5.23077	0	0	0	0	0	0	0.307692	0	0	0	0.307692	1.84615	0.307692	0	7.07692	1.53846	0.307692	0	0	0	0	0	0	0	0	0	0	0	0	1.23077	0	0	0	0.307692	2.15385	0	0	0
928	928	910.005	2.4147	0	0	0	0	0	0	0	0	0.338983	0	0.338983	0	0	0	0	0	0	0	0.338983	0	0	0	4.40678	2.37288	0	0	0	0	0	0	0	0	0	0	0	0	0	3.05085	0	0	0	0	6.77966	0	0	0
928.75	928.75	911.061	2.4163	0	0	0	0	0	0	0	0	0	0	0	0	0.289017	0	0.289017	0	0	0	0	0	0	0	9.24855	4.33526	0	0	0	0	0	0.578035	0	0	0	0	0	0	0	0.578035	0	0	0	0	8.09249	0	0	0.289017
929.5	929.5	912.143	2.418	0	0	0	0	0	0	0	0	0	0	0	0	0	0	0	0	0	0	0	0.490196	0	0	1.47059	7.84314	0	0	0.245098	0	0	0.245098	0	0	0	0	0	0	0	0	0	0	0	0	1.96078	0	0	0
929.55	929.55	912.188	2.4181	0	0	0	0	0	0	0	0.754717	0	0	0	0	0	0	0.377358	0	0	0	0	0	0	0	3.77358	3.39623	0	0	0	0	0	0	0	0	0	0	0	0	0	0.754717	0	0	0	0	4.90566	0	0	0.377358
930.25	930.25	913.214	2.4196	0	0	0	0	0	0	0	0.357143	0	0	0	0	0	0	0	0.357143	0	0	0.357143	0	0	0	3.92857	5	0	0	0	0	0	0	0	0	0	0	0	0	0	0.357143	0	0	0	0	1.78571	0	0	0
938.1	938.1	923.1	2.431	0	0	0	0	0	0	0	0	0	0	0	0	0	0	0.512821	0	0	0	0	3.58974	0	0	2.05128	5.12821	0	0	0	0	0	1.53846	0	0	0	0	0	0	0	0	0	0	1.02564	0	0	0	0	3.58974
943.6	943.6	928.6	2.4353	0	0	0	0	0	0	0	0	1.96078	0.653595	0	0	0	0	0	0	0	0	0	3.92157	0	0	0	5.22876	0	0	1.96078	0	0	0	0	0	0	0	0	0	0	0	0	0	0	0	0	0	0	3.92157
971.4	971.4	956.4	2.4627	0.283286	0	0	0	0	0	0	0	0	0	0	0	0	0	0	0	0.283286	0	0	0.566572	0	0	2.26629	9.06516	0	0	0	0.283286	0	0.849858	0	0	0	0	0	0	0	0.566572	0	0	0	0	13.0312	0	0	0
974.85	974.85	959.85	2.4684	0	0	0	0	0	0	0	0	0	0	0	0	0	0	0	0	0	0	0	0	0	0	0.985222	3.94089	0	0	0.492611	0	0	0.985222	0	0	0	0	0	0	0	1.47783	0	0	0	0	6.40394	0	0	0
975.1	975.1	960.1	2.4688	0	0	0	0	0	0	0	0	0	0	0	0	0	0	0	0	0	0	0	0	0	0	13.1148	1.63934	0	0	0	0	0	0	0	0	0	0	0	0	0	4.91803	0	0	0	0	9.83607	0	0	0
976.8	976.8	961.8	2.4717	0	0	0	0	0	0	0	1.05634	0	0	0	0	0	0	0	0	0	0	0	0	0	0	6.69014	2.46479	0	0.352113	0	0	0	0	0	0	0	0	0	0.352113	0	3.16901	0	0	0	0	3.52113	0	0	0
977.45	977.45	962.45	2.4728	0	0	0	0	0	0.31746	0	0	0	0	0	0	0	0	0.31746	0	0.31746	0	0	0.634921	0	0	1.90476	3.80952	0	0.31746	0.31746	0	0	2.85714	0	0	0	0	0	0	0	1.26984	0	0	0.31746	0	0.634921	0	0	0
978.3	978.3	963.3	2.4742	0	0	0	0	0	0	0	0	0	0	0	0	0	0	0	0	0	0	0.378788	0	0	0	3.78788	5.30303	0	0	0	0	0	0	0	0	0	0	0	0	0	1.13636	0	0	0	0	1.13636	0	0	0.378788
978.85	978.85	963.85	2.4751	0.387597	0	0	0	0	0	0	0	0.775194	0	0	0	0	0	0	0	0	0	0	0	0	0	1.55039	8.91473	0	0	0.387597	0	0	0.387597	0	0	0	0	0	0	0	0	0	0	0.387597	0	0	0	0	0
980.8	980.8	965.8	2.4777	0	0	0.355872	0	0	0	0.355872	1.06762	0	0	0	0	0	0	0.355872	0.355872	0	0	0.711744	0	0	0	4.62633	7.82918	0	0	0	0	0	0	0	0	0	0	0.355872	0	0	1.06762	0	0	0	0	1.77936	0	0	2.4911
981.8	981.8	966.8	2.4785	0	0	0	0	0	0	0	0	0	0	0	0	0	0	0	0.280899	0.280899	0	0	1.1236	0	0	0.280899	13.4831	0	0	0	0	0	0	0	0	0	0	0.280899	0	0	0.280899	0	0	0	0	0.561798	0	0	0.280899
983.5	983.5	968.5	2.48	0	0	0	0	0	0	0	0.854701	0	0	0	0	0	0	0.2849	0.2849	0.2849	0	0.2849	0	0	0	6.26781	11.396	0	0.2849	0	0	0	0.2849	0	0	0	0	0	0	0	2.2792	0	0	0	0	3.7037	0	0	0
984.5	984.5	969.5	2.4808	0	0	0	0	0.298507	0	0	2.38806	0	0.597015	0.298507	0	0	0	0	0.298507	0	0	0	0	0	0	4.77612	11.3433	0	0	0	0	0	0.298507	0	0	0	0	0	0.298507	0	0.597015	0	0	0	0	2.98507	0	0	1.19403
984.8	984.8	969.8	2.4811	0	0	0	0	0	0	0	0	0	0	0	0	0	0	0.581395	0	0	0	0	0	0	0	0	25	0	0.581395	1.16279	0	0	1.16279	0	0	0	0	0	0	0	0.581395	0	0	0	0	1.74419	0	0	0.581395
986.15	986.15	971.064	2.4822	0	0	0	0	0	0	0.302115	1.20846	0	0	0	0	0	0	0.302115	0.302115	0	0	0.302115	0	0	0	4.22961	7.85498	0	0.60423	0	0	0	0	0	0	0	0	0	0	0	2.71903	0	0	0	0	5.13595	0	0	0.906344
987.15	987.15	972	2.483	0	0	0	0	0	0	0	0	0	0	0	0	0	0	0	0	0	0	0	1.93237	0	0	0.966184	27.5362	0	0.483092	0.483092	0	0	6.76329	0	0	0	0	0	0	0	1.44928	0	0	0	0	1.44928	0	0	0
988.5	988.5	973.256	2.484	0	0	0	0	0	0	0	0	0	0	0	0	0	0	0	0	0	0	0	0	0	0	0.403226	33.0645	0	0	0.806452	0	0	3.62903	0	0	0	0	0	0	0	0	0	0	0	0	1.6129	0	0	0.403226
989	989	973.716	2.4844	0	0	0	0	0	0	0	0	0	0.30581	0	0	0	0	0.30581	0	0.30581	0	0.30581	0	0	0	4.58716	14.3731	0	0.611621	0	0	0	0	0	0	0	0	0	0	0	0.917431	0	0	0	0	2.44648	0	0	1.83486
997.8	997.8	981.907	2.4914	0	0	0	0	0	0	0	0	0	0	0	0	0	0	0	0.293255	0.293255	0	0	0.879765	0	0	1.17302	14.3695	0	0	0	0	0	2.05279	0	0	0	0	0.879765	0	0	0	0	0	0	0	1.17302	0	0	0.293255
999.8	999.8	983.767	2.493	0	0	0	0	0	0	0	0	0	0	0	0	0	0	0	0	0	0	0	1.33333	0	0	0	13.3333	0	0	0	0	0	0.266667	0.266667	0	0	0	0	0	0	1.33333	0	0	0	0	2.66667	0	0	0
1003.8	1003.8	987.488	2.4967	0	0	0	0	0	0.45045	0	0	0	0	0	0	0	0	0	0	0	0	0	0.45045	0	0	3.6036	7.20721	0	0	0	0.900901	0	1.35135	0	0	0	0	0	0	0	0	0	0	0	0	9.00901	0	0	0.45045
1008.35	1008.35	991.721	2.5012	0.502513	0	0	0	0	0	0	0	0.502513	0	0	0	0	0	0	0	0	0	0	2.01005	0	0	1.00503	5.02513	0	0	0	0	0	0	0	0	0	0	0	0	0	0	0	0	0	0	5.52764	0	0	0
1011.3	1011.3	994.465	2.5041	0	0	0	0	0	0	0	0	0	0	0	0	0	0	0	0	0	0	0	0.909091	0	0	3.63636	9.09091	0	0	0	0.909091	0	0.909091	0	0	0	0	0	0	0	0	0	0	0	0	4.54545	0	0	0
1014.3	1014.3	997.256	2.5071	0	0	0	0	0	0.675676	0	0	0	0	0	0	0	0	0	0.675676	0	0	0	2.7027	0	0	2.7027	6.08108	0	0	0	0	0	0	0	0	0	0	0	0	0	0	0	0	0	0	17.5676	0	0	1.35135
1064	1064	1037.69	2.5642	0.288184	0	0	0	0	0.288184	0	0	1.44092	0	0.288184	0.288184	0	0	0	0	0	0	0	0	0	0.288184	0	18.1556	0	0	0	0	0	0.576369	0	0	0	0.288184	0	0	0	0	0	0	0	0	0.288184	0	0	1.15274
1067	1067	1040	2.5666	0.70922	0	0.531915	0	0	0.531915	0	0	0.177305	0.177305	0	0	0	0	0.35461	0.177305	0.70922	0	0	0	0	0	0	8.68794	0	0	0.177305	0	0	1.77305	0	1.41844	0	0.531915	0	0	0	11.5248	0	0	0	0	0	0	0	0
1070	1070	1042.31	2.569	1.15894	0	1.82119	0	0	0.496689	0	0	0.331126	0.496689	0.165563	0	0	0	0	0.165563	0.165563	0	0	1.98675	0	0	0	10.4305	0	0	0.331126	0	0	5.13245	0	1.3245	0	0.662252	0	0	0	9.60265	0	0	0	0	0	0	0	0
1073	1073	1044.62	2.5715	0	0.215517	0.215517	0	0	1.07759	0	0	0	0	0	0	0	0.215517	0	0.215517	0	0	0	1.2931	0	0	0	10.9914	0	0	0.215517	0	0	2.58621	0.215517	1.2931	0	0	0.215517	0	0.646552	7.75862	0	0	0	0	0	0	0.646552	0
1076	1076	1046.92	2.5739	0.225734	0	2.25734	0	0	1.12867	0	0	0	1.58014	0	0	0	0	0	0.225734	1.12867	0	0	0.225734	0	0	0	11.2867	0	0	0.225734	0	0	7.22348	0	0.902935	0	0.451467	0.225734	0	0	3.83747	0	0	0	0	0.225734	0.451467	0.225734	0
1079	1079	1049.23	2.5753	0.229885	0	0.45977	0	0	1.14943	0	0	0.45977	0	0	0	0	0.45977	0	0	0.229885	0.229885	0.91954	0.689655	0	0	0	5.74713	0	0	0.229885	0	0	8.27586	0	0.45977	0	0.689655	0.229885	0	0	3.21839	0	0	0	0	1.6092	0	0.689655	0
1082	1082	1051.54	2.5758	0.833333	0	0.208333	0	0.208333	0.833333	0	0	0	0.625	0	0	0	0	0	0	0.208333	0.208333	1.45833	0.625	0	0	0	13.9583	0	0	0.416667	0	0	4.58333	0	0.833333	0	0.208333	0	0	0	5.83333	0	0	0	0	0.208333	0	0.416667	0.208333
1084	1084	1053.08	2.5762	0	0	0	0	0	1.31579	0	0	0.263158	0.526316	0	0	0	0	0	0.263158	0	0.263158	4.21053	0.526316	0	0	0	5	0	0	0.526316	0	0	4.73684	0	0.263158	0.263158	0.526316	0	0	0	4.21053	0	0	0	0	0.263158	0	0.263158	0
1085	1085	1053.85	2.5763	0.185185	0	0.185185	0	0	1.11111	0	0	0.555556	0.740741	0	0	0	0.37037	0	0	0.37037	0	2.96296	0.925926	0	0	0	2.77778	0	0	0.185185	0	0	3.51852	0.185185	0.925926	0	0	0	0	0	3.14815	0	0	0	0	1.11111	0	0.555556	0
1086	1086	1054.62	2.5765	0	0	1.34048	0	0.268097	0.536193	0	0	0.268097	0	0	0	0	1.87668	0	0	0.268097	0	1.87668	0.268097	0	0	0	2.94906	0	0	0.536193	0.268097	0	3.21716	0	1.60858	0	0.536193	0	0	0	3.75335	0	0	0	0	2.14477	0.268097	0	0
1088	1088	1056.15	2.5769	0	0	0.290698	0	0	0.290698	0	0	0	0	0	0	0	1.45349	0	0	0	0	1.74419	0.581395	0	0	0	3.19767	0	0	0	0	0	1.74419	0	2.03488	0	1.45349	0	0	0.872093	4.36047	0	0	0	0	1.45349	0.581395	0	0
1089.9	1089.9	1057.62	2.5772	0.238663	0	0.596659	0	0	0	0	0	0.357995	0	0	0	0	1.19332	0	0.119332	0	0	0.357995	0.238663	0	0	0	2.38663	0	0	0.238663	0	0	5.2506	0	0.71599	0	0.477327	0	0	0	5.36993	0	0	0	0	0.477327	0	0	0.835322
[truncated: 110 more columns]

## Sheet: A15-3&4 indices paly
Depth (mbsl) splice	Age (splice) (Ma)	% cold Dinos	% Coastal dinos	% Protoperidiniods		%AP	% AP incl Erica	Terrestrial/marine ratio	% Ericaceae total	Pinus tot
810	2.35	13.8614	68.3168	0		0.144737	10.6796	0.476684	18.4932	20.5479
814	2.3526	11.3208	51.8519	0		0	...	0.805054	0	0
830	2.3631	...	...	...		0	0	0.919355	5.33333	61.3333
838	2.3684	16.3265	6.12245	0		0	...	0.766667	0	0
850	2.3746	...	44.4444	0		0.25	12.5	0.870504	30.137	27.3973
870	2.3808	44.4444	25.3333	1.33333		0.382979	23.6842	0.581006	23.9669	28.0992
890.05	2.3871	17.1429	45.7143	2.85714		0.305556	20.7547	0.95283	12.9278	39.7338
890.8	2.3881	37.5	21.875	0		0	...	0.908309	0	0
891.75	2.3893	...	...	...		0.212598	17.3077	...	7.37913	45.0382
892.8	2.3907	10.5263	10	20		0.20354	14.2857	0.971182	11.3475	31.2057
893.8	2.3921	...	...	...		0.165289	12.987	...	8.06846	48.1663
894.8	2.3934	...	...	0		0.158163	9.42249	0.998851	18.9729	38.2311
895.8	2.3947	42	12	22		0.176471	13.0435	0.925373	9.13706	31.4721
896.8	2.3961	...	...	...		0.232143	19.403	...	3.73514	64.8557
897.8	2.3974	...	...	...		0.186722	15.0502	0.999131	6.58343	52.5539
898.8	2.3987	...	...	...		0.229358	19.084	...	4.46247	54.9696
899.35	2.3995	...	...	...		0.152381	10.3896	...	12.0098	50.9804
899.8	2.4001	...	...	...		0.224138	17.5676	...	6.06635	57.6303
900.8	2.4014	...	...	...		0.261905	17.3684	...	16	42.25
901.724	2.4026	23.0769	11.5385	3.84615		0.272727	10.6195	0.875598	37.5	30.4348
901.8	2.4027	...	...	...		0.177966	10	...	28.483	21.9814
902.8	2.4041	38.7755	13.7931	1.72414		0.168224	10.1695	0.978039	18.7668	35.6568
903.85	2.4055	...	...	...		0.156098	9.7561	...	17.0596	38.1415
904.43	2.4062	10.1695	53.3333	23.3333		0.084507	7.22892	0.684211	7.5	33.125
904.784	2.4067	6.66667	72.5	7.5		0.170732	8.86076	0.543726	11.6564	69.0184
904.8	2.4067	15.7895	11.4943	5.17241		0.232143	19.697	0.612472	5.89971	35.3982
904.8	2.4067	...	...	...		0.180851	13.2813	...	10.3343	44.3769
905.26	2.4074	...	...	...		0.173333	10.5691	...	15.0943	43.7107
906.319	2.409	11.2583	19.8675	2.64901		0.13253	10.5769	0.403162	6.5625	51.25
906.6	2.4095	23.3533	9.58084	7.18563		0.390805	32.381	0.552279	5.86319	54.3974
906.94	2.41	12.8205	25	6.41026		0.316832	23.8806	0.650224	11.0368	40.4682
907.2	2.4104	13.6905	27.9762	3.57143		0.333333	27.8195	0.728595	6.91824	42.1384
907.5	2.4108	8.86076	50.6329	6.96203		0.406977	33.6538	0.416974	7.14286	39.2857
907.8	2.4113	14.1104	31.9018	8.58896		0.257143	21.2598	0.480892	6.91824	50.6289
908	2.4116	3.8835	85.4369	2.91262		0.156627	13.4021	0.258993	9.79021	11.8881
908.276	2.412	17.7515	30.9942	9.94152		0.625	32.6087	0.541555	10.2804	68.2243
908.65	2.4126	28.4091	10.7955	1.70455		0.1875	14.3836	0.75657	10.2102	48.3483
908.966	2.4131	24.7525	1.96078	7.84314		0.44	40.7407	0.696429	3.33333	45
909.05	2.4132	31.875	4.96894	8.07453		0.201835	14.8649	0.661765	12.381	51.746
909.526	2.414	21.3333	2.63158	3.94737		0.694915	45.5556	0.638095	13.7168	38.4956
909.82	2.4144	17.2414	4	2.85714		0.27027	20.8333	0.513889	6.76923	63.3846
910.005	2.4147	...	...	...		0.395349	34	...	2.37288	70.1695
911.061	2.4163	...	...	...		0.355932	28.3784	...	4.33526	63.0058
912.143	2.418	29.3578	17.2727	8.18182		0.567568	30.4348	0.54918	7.84314	78.4314
912.188	2.4181	...	...	...		0.482759	35	...	4.15094	73.5849
913.214	2.4196	...	...	...		0.36	22.5	...	5.35714	77.5
917.55	2.4263	...	...	...		0.164557	15.4762	...	1.47929	55.9172
918.15	2.4271	10.5263	0	4.34783		0.145455	13.5593	0.693333	1.98511	41.9355
918.15	2.4271	...	...	...		0.145455	13.5593	...	2.2409	47.3389
920	2.4286	...	...	...		0.0806452	6.25	...	6.44007	62.254
920	2.4286	...	...	...		0.245614	20.2899	...	3.87097	67.4194
920.6	2.429	9.09091	5.45455	30.9091		0.192982	13.5802	0.694444	15.2866	36.3057
920.95	2.4293	...	...	...		0.0666667	4.7619	...	4.54545	71.9697
921.05	2.4294	...	...	...		0.25	18.5185	...	5.22388	74.6269
921.95	2.4301	...	...	...		0.152174	11.1111	...	5.2795	71.7391
923	2.4309	...	...	...		0.266667	16.3265	...	6.44068	75.5932
923.1	2.431	10.5263	0	11.8421		0.173913	12.1212	0.711027	5.12821	75.3846
924	2.4317	...	...	...		0.16129	11.1111	...	4.69799	72.1477
924.5	2.4321	...	...	...		0.117647	6.89655	...	4.0404	79.4613
925	2.4325	...	...	...		0.145455	11.7647	...	4.51389	65.9722
926.55	2.4337	...	...	...		0.25	16.6667	...	2.6936	76.0943
926.7	2.4338	...	...	...		0.3125	16.6667	...	4.77816	78.8396
927.76	2.4346	...	...	...		0.16	13.3333	...	1.53374	82.8221
928.45	2.4352	...	...	...		0.0740741	5	...	3.11005	83.4928
928.5	2.4352	...	0	63.6364		0.166667	16.6667	0.90678	0	49.2958
928.6	2.4353	4.54545	0	50		0.545455	40	0.823755	5.22876	75.1634
929.2	2.4358	...	...	...		0.125	11.1111	...	1.47059	73.5294
929.95	2.4363	...	...	...		0.222222	18.75	...	1.70068	80.6122
935.9	2.441	...	...	...		0.241379	14.2857	...	6.60066	72.2772
936.9	2.4418	...	...	...		0.27027	21.7391	...	2.71084	71.3855
938.9	2.4433	...	...	...		0.185185	13.1579	...	3.72881	81.0169
939.8	2.444	...	...	...		0.294118	18.5185	...	3.98406	81.6733
940.9	2.4449	...	...	...		0.222222	17.9104	...	3.66197	70.9859
941.9	2.4457	27.5	5	27.5		0	...	0.896641	0	0
942.9	2.4465	...	...	...		0.16	11.7647	...	3.44828	82.7586
943.85	2.4472	...	...	...		0.237288	14.5833	...	10.6628	59.9424
944.5	2.4477	...	...	12.5		0.169492	12.0482	0.942857	16.5517	25.5172
945.9	2.4488	...	...	...		0.309091	19.3182	...	9.88024	61.3772
946.8	2.4495	...	...	...		0.119048	9.09091	0.990991	11.1111	39.3162
946.91	2.4496	...	...	...		0.12963	9.21053	...	6.96203	67.4051
947.74	2.4502	...	...	...		0.282609	18.8406	...	7.54098	69.1803
953.25	2.4574	25.5814	3.48837	13.9535		0	...	0.803653	0	0
954.15	2.4589	...	...	...		0.25	13.7931	...	8.41424	70.8738
955.2	2.4607	...	...	...		0.0714286	4.34783	...	6.18557	70.7904
955.6	2.4613	11.4286	46.6667	5.71429		0.16	14.1176	0.453125	7.5188	18.0451
956.18	2.4623	...	...	...		0.134615	10.9375	...	3.63636	67.2727
956.31	2.4625	...	...	...		0.264706	21.9512	...	2.5	73.2143
956.4	2.4627	10.9756	23.7805	10.9756		0.563636	35.6322	0.428571	9.06516	59.2068
957.3	2.4642	...	...	...		0.315789	24.3243	...	4.97076	61.4035
957.34	2.4642	...	...	...		0.357143	29.0698	...	4.62428	61.2717
958.25	2.4658	...	...	...		0.355556	30.7692	...	2.4055	68.3849
959.2	2.4673	5.43478	14.8936	12.766		0	...	0.702532	0	0
959.85	2.4684	11.1111	22.7941	9.55882		0.4	28.5714	0.390135	3.94089	75.3695
960.1	2.4688	...	...	...		0.153846	14.2857	...	1.63934	55.7377
960.67	2.4698	...	...	...		0.5	44.8598	...	2.89474	53.4211
961.4	2.471	26.3636	34.5455	4.54545		0.285714	28.5714	0.411765	0	58.9474
961.4	2.471	...	...	...		0.352941	28.9157	...	4.13223	62.259
961.8	2.4717	...	...	...		0.030303	2.32558	...	3.52113	72.8873
962.2	2.4723	...	...	...		0.204545	16.6667	...	4.69484	50.2347
962.45	2.4728	10.7527	1.07527	21.5054		0.25641	19.6078	0.599138	3.80952	79.3651
963.17	2.474	...	...	...		0.444444	42.1053	...	0.775194	65.1163
963.3	2.4742	...	...	...		0.176471	9.67742	...	5.30303	78.0303
963.85	2.4751	14.6667	1.33333	29.3333		0.466667	18.4211	0.722222	8.91473	81.0078
964.14	2.4756	...	...	...		0.142857	8.69565	...	12.1622	39.1892
965.8	2.4777	...	...	...		0.2	10.9091	...	8.8968	70.4626
966.8	2.4785	13.0435	0	46.7391		0.391304	12.6761	0.670251	13.4831	76.4045
968.5	2.48	...	...	...		0.14	7.52688	...	12.2507	62.6781
969.5	2.4808	...	...	...		0.047619	2.27273	...	13.7313	65.9701
969.8	2.4811	31.4607	0	28.8889		0.285714	7.01754	0.649805	25	61.6279
971.064	2.4822	...	...	...		0.152174	9.21053	...	9.06344	64.9547
972	2.483	30.4348	0	47.8261		0.292683	12.2449	0.809129	27.5362	48.3092
973.256	2.484	12.5	0	22.4138		0.268293	8.94309	0.751073	33.0645	45.5645
973.716	2.4844	...	...	...		0.205882	8.64198	...	14.3731	65.4434
975	2.4855	26.8293	16.8675	6.0241		0.150943	8.24742	0.569948	30.137	23.9726
981.907	2.4914	54.8148	0	11.6788		0.25	13.7615	0.388393	14.3695	63.9296
983.767	2.493	18.3099	0	12.6761		0.276923	15.6522	0.554859	13.3333	63.2
985	2.494	43.1193	10.0917	0		0.0625	3.2967	0.384181	26.2195	35.9756
987.488	2.4967	6.50407	18.6992	4.87805		0.456522	33.871	0.508	7.20721	46.8468
990	2.4993	19.3878	21.4286	2.04082		0.15942	11.5789	0.546296	15.7576	30.303
991.721	2.5012	11.1801	8.07453	8.07453		0.470588	29.6296	0.375969	5.02513	64.8241
994.465	2.5041	13.7405	9.16031	3.05344		0.2	10	0.444915	9.09091	63.6364
995	2.5047	12	16	4.8		0.105263	8	0.309392	7.40741	53.0864
997.256	2.5071	10.3448	19.1781	10.9589		0.25	16	0.345291	6.08108	53.3784
1015	2.5325	28.7037	17.5926	7.40741		0.185714	13.2653	0.465347	17.9487	25
1030	2.5561	42.9907	5.60748	2.80374		0.121212	9.09091	0.439791	16.1765	29.4118
1037.69	2.5642	31.0345	1.72414	29.3103		0.36	10.2273	0.742222	18.1556	71.7579
1040	2.5666	21.5686	0	11.7647		0.275862	20.6186	0.777293	8.68794	61.8794
1042.31	2.569	51.0638	0	4.25532		0.308108	22.9839	0.799145	10.4305	53.8079
1044.62	2.5715	32.1839	0	6.89655		0.218182	14.9068	0.682482	10.9914	60.5603
1046.92	2.5739	12.1951	0	7.31707		0.389313	28.1768	0.528736	11.2867	52.8217
1049.23	2.5753	4.7619	1.5748	13.3858		0.548611	46.7456	0.51711	5.74713	53.7931
1050	2.5755	25	4.54545	4.54545		0.338983	23.2558	0.572816	17.4194	30.9677
1051.54	2.5758	13.7255	0.980392	10.7843		0.412698	26.943	0.552632	13.9583	55.4167
1053.08	2.5762	...	...	...		0.540146	47.4359	...	5	52.8947
1053.85	2.5763	7.18954	20.1299	5.84416		0.628743	57.6923	0.421053	2.77778	61.2963
1054.62	2.5765	6.34921	57.672	3.7037		0.609091	55.3719	0.354949	2.94906	59.2493
1056.15	2.5769	11.5385	34.3511	3.81679		0.67	60.3604	0.458678	3.19767	61.6279
1057.62	2.5772	13.6752	1.69492	11.0169		0.376344	33.9806	0.544402	2.38663	70.1671
1070	2.58	14.5631	20.3883	2.91262		0.1875	15.3846	0.497561	9.92908	31.2057
