# Supplementary material for: Land–sea coupling of Early Pleistocene glacial cycles in the southern North Sea exhibit dominant Northern Hemisphere forcing
Source: Copernicus journal article supplement (doi:10.5194/cp-2017-113), 2017-09-20
Supplement: Supplementary file 1 [file DataA15Geochemistry.xlsx]

## Sheet: GammaRay
Depth (mbsl)	Age (Ma)	Gamma ray (API)
810.006	2.35001	154.036
810.158	2.3501	156.254
810.311	2.3502	150.492
810.463	2.3503	154.406
810.616	2.3504	150.101
810.768	2.3505	147.648
810.92	2.3506	147.412
811.073	2.35071	147.647
811.225	2.3508	153.019
811.378	2.35091	151.014
811.53	2.35101	149.474
811.682	2.35111	148.405
811.835	2.35121	152.657
811.987	2.35131	155.24
812.14	2.35141	152.754
812.292	2.35151	154.222
812.444	2.35161	148.093
812.597	2.35171	156.538
812.749	2.35181	154.47
812.902	2.35191	155.406
813.054	2.35201	146.448
813.206	2.35211	142.429
813.359	2.35221	145.405
813.511	2.35231	148.69
813.664	2.35241	155.186
813.816	2.35251	150.231
813.968	2.35261	146.187
814.121	2.35271	145.144
814.273	2.35281	147.669
814.426	2.35291	147.254
814.578	2.35301	148.846
814.73	2.35311	152.319
814.883	2.35321	156.256
815.035	2.35331	158.159
815.188	2.35341	154.01
815.34	2.35351	150.204
815.492	2.35361	142.536
815.645	2.35371	143.295
815.797	2.35381	147.884
815.95	2.35391	152.735
816.102	2.35401	162.18
816.254	2.35411	160.329
816.407	2.35421	159.155
816.559	2.35431	149.971
816.712	2.35441	151.561
816.864	2.35451	144.885
817.016	2.35461	145.04
817.169	2.35471	143.971
817.321	2.35481	148.038
817.474	2.35491	151.404
817.626	2.35501	146.341
817.778	2.35511	143.187
817.931	2.35521	139.845
818.083	2.35531	141.248
818.236	2.35541	147.376
818.388	2.35551	149.961
818.54	2.35561	154.012
818.693	2.35571	148.951
818.845	2.35581	144.753
818.998	2.35591	139.929
819.15	2.35601	146.451
819.302	2.35611	153.101
819.455	2.35621	157.143
819.607	2.35631	152.838
819.76	2.35641	152.239
819.912	2.35651	154.977
820.064	2.35661	154.716
820.217	2.35671	153.751
820.369	2.35681	153.255
820.522	2.35691	152.97
820.674	2.35701	150.647
820.826	2.35711	152.577
820.979	2.35721	157.82
821.131	2.35731	162.695
821.284	2.35742	156.591
821.436	2.35752	153.826
821.588	2.35761	148.192
821.741	2.35772	152.105
821.893	2.35782	158.364
822.046	2.35792	160.818
822.198	2.35802	161.053
822.35	2.35812	152.472
822.503	2.35822	150.907
822.655	2.35832	149.212
822.808	2.35842	146.84
822.96	2.35852	144.208
823.112	2.35862	140.212
823.265	2.35872	145.167
823.417	2.35882	152.365
823.57	2.35892	156.777
823.722	2.35902	155.604
823.874	2.35912	158.995
824.027	2.35922	161.969
824.179	2.35932	163.299
824.332	2.35942	157.924
824.484	2.35952	149.994
824.636	2.35962	149.16
824.789	2.35972	149.674
824.941	2.35982	166.51
825.094	2.35992	168.391
825.246	2.36002	171.145
825.398	2.36012	162.37
825.551	2.36022	159.995
825.703	2.36032	157.405
825.856	2.36042	158.475
826.008	2.36052	161.864
826.16	2.36062	157.665
826.313	2.36072	155.186
826.465	2.36082	155.159
826.618	2.36092	160.871
826.77	2.36102	161.001
826.922	2.36112	160.142
827.075	2.36122	158.214
827.227	2.36132	152.711
827.38	2.36142	156.103
827.532	2.36152	152.721
827.684	2.36162	157.963
827.837	2.36172	147.634
827.989	2.36182	150.232
828.142	2.36192	146.442
828.294	2.36202	149.286
828.446	2.36212	148.268
828.599	2.36222	149.22
828.751	2.36232	147.858
828.904	2.36242	150.05
829.056	2.36252	151.474
829.208	2.36262	154.32
829.361	2.36272	152.364
829.513	2.36282	156.669
829.666	2.36292	155.756
829.818	2.36302	158.103
829.97	2.36312	154.298
830.123	2.36322	156.855
830.275	2.36332	150.075
830.428	2.36342	147.832
830.58	2.36352	152.754
830.732	2.36362	158.585
830.885	2.36372	161.089
831.037	2.36382	154.785
831.19	2.36392	149.996
831.342	2.36402	147.671
831.494	2.36412	152.889
831.647	2.36423	155.861
831.799	2.36433	153.099
831.952	2.36443	144.335
832.104	2.36453	143.636
832.256	2.36463	145.544
832.409	2.36473	147.786
832.561	2.36483	150.161
832.714	2.36493	157.151
832.866	2.36503	156.63
833.018	2.36513	159.983
833.171	2.36523	151.192
833.323	2.36533	152.724
833.476	2.36543	141.484
833.628	2.36553	149.959
833.78	2.36563	153.775
833.933	2.36573	163.141
834.085	2.36583	161.234
834.238	2.36593	162.38
834.39	2.36603	159.015
834.542	2.36613	148.666
834.695	2.36623	151.28
834.847	2.36633	153.628
835	2.36643	165.521
835.152	2.36653	155.848
835.304	2.36663	155.952
835.457	2.36673	145.777
835.609	2.36683	145.664
835.762	2.36693	141.071
835.914	2.36703	144.83
836.066	2.36713	148.856
836.219	2.36723	155.274
836.371	2.36733	158.298
836.524	2.36743	157.428
836.676	2.36753	154.365
836.828	2.36763	152.644
836.981	2.36773	153.819
837.133	2.36783	153.622
837.286	2.36793	151.559
837.438	2.36803	146.602
837.59	2.36813	142.44
837.743	2.36823	140.721
837.895	2.36833	139.938
838.048	2.36843	146.682
838.2	2.36853	155.054
838.352	2.36863	157.271
838.505	2.36873	155.498
838.657	2.36883	152.107
838.81	2.36893	149.735
838.962	2.36903	147.909
839.114	2.36913	146.971
839.267	2.36923	151.821
839.419	2.36933	154.925
839.572	2.36943	155.579
839.724	2.36953	153.883
839.876	2.36963	151.38
840.029	2.36973	146.577
840.181	2.36983	145.534
840.334	2.36993	146.523
840.486	2.37003	152.759
840.638	2.37013	152.237
840.791	2.37023	149.993
840.943	2.37033	149.342
841.096	2.37043	152.447
841.248	2.37053	150.49
841.4	2.37063	151.533
841.553	2.37073	147.752
841.705	2.37083	151.118
841.858	2.37094	146.665
842.01	2.37104	150.055
842.162	2.37114	147.757
842.315	2.37124	153.671
842.467	2.37134	158.626
842.62	2.37144	158.601
842.772	2.37154	151.948
842.924	2.37164	148.558
843.077	2.37174	149.863
843.229	2.37184	151.665
843.382	2.37194	146.192
843.534	2.37204	143.844
843.686	2.37214	144.33
843.839	2.37224	145.334
843.991	2.37234	138.028
844.144	2.37244	129.478
844.296	2.37254	123.016
844.448	2.37264	128.081
844.601	2.37274	133.169
844.753	2.37284	132.997
844.906	2.37294	135.083
845.058	2.37304	135.153
845.21	2.37307	138.678
845.363	2.37311	134.897
845.515	2.37316	135.586
845.668	2.37321	135.125
845.82	2.37326	138.539
845.972	2.3733	136.344
846.125	2.37335	134.605
846.277	2.3734	134.312
846.43	2.37344	135.877
846.582	2.37349	134.443
846.734	2.37354	136.171
846.887	2.37359	135.887
847.039	2.37363	138.125
847.192	2.37368	133.299
847.344	2.37373	131.567
847.496	2.37378	133.155
847.649	2.37382	136.653
847.801	2.37387	136.713
847.954	2.37392	131.994
848.106	2.37397	129.516
848.258	2.37401	132.252
848.411	2.37406	131.449
848.563	2.37411	129.254
848.716	2.37416	126.105
848.868	2.3742	134.58
849.02	2.37425	133.145
849.173	2.3743	132.928
849.325	2.37435	130.213
849.478	2.37439	133.825
849.63	2.37444	134.694
849.782	2.37449	128.954
849.935	2.37454	127.799
850.087	2.37458	121.69
850.24	2.37463	121.931
850.392	2.37468	118.802
850.544	2.37472	118.652
850.697	2.37477	116.063
850.849	2.37482	116.736
851.002	2.37487	116.364
851.154	2.37491	121.561
851.306	2.37496	122.212
851.459	2.37501	123.908
851.611	2.37506	123.386
851.764	2.3751	126.495
851.916	2.37515	128.321
852.068	2.3752	122.323
852.221	2.37525	113.327
852.373	2.37529	116.044
852.526	2.37534	120.648
852.678	2.37539	126.422
852.83	2.37544	126.575
852.983	2.37548	125.361
853.135	2.37553	122.475
853.288	2.37558	117.758
853.44	2.37563	114.908
853.592	2.37567	115.43
853.745	2.37572	113.474
853.897	2.37577	119.997
854.05	2.37582	123.346
854.202	2.37586	127.024
854.354	2.37591	128.72
854.507	2.37596	126.154
854.659	2.37601	126.408
854.812	2.37605	122.604
854.964	2.3761	126.518
855.116	2.37615	127.692
855.269	2.37619	133.559
855.421	2.37624	132.777
855.574	2.37629	133.69
855.726	2.37634	131.343
855.878	2.37638	131.321
856.031	2.37643	132.082
856.183	2.37648	129.104
856.336	2.37653	130.038
856.488	2.37657	124.321
856.64	2.37662	125.734
856.793	2.37667	121.69
856.945	2.37672	131.865
857.098	2.37676	131.344
857.25	2.37681	136.419
857.402	2.37686	131.983
857.555	2.37691	132.505
857.707	2.37695	131.713
857.86	2.377	129.474
858.012	2.37705	128.843
858.164	2.3771	129.234
858.317	2.37714	130.771
858.469	2.37719	134.271
858.622	2.37724	132.075
858.774	2.37729	132.494
858.926	2.37733	128.864
859.079	2.37738	131.842
859.231	2.37743	127.037
859.384	2.37748	128.451
859.536	2.37752	127.277
859.688	2.37757	133.852
859.841	2.37762	129.569
859.993	2.37766	129.438
860.146	2.37771	127.321
860.298	2.37776	131.734
860.45	2.37781	128.626
860.603	2.37785	124.409
860.755	2.3779	122.605
860.908	2.37795	122.976
861.06	2.378	124.301
861.212	2.37804	123.758
861.365	2.37809	123.628
861.517	2.37814	128.431
861.67	2.37819	129.234
861.822	2.37823	129.646
861.974	2.37828	125.822
862.127	2.37833	124.627
862.279	2.37838	128.802
862.432	2.37842	130.018
862.584	2.37847	134.474
862.736	2.37852	137.059
862.889	2.37857	140.472
863.041	2.37861	140.58
863.194	2.37866	138.103
863.346	2.37871	139.383
863.498	2.37875	141.624
863.651	2.3788	140.342
863.803	2.37885	141.671
863.956	2.3789	138.279
864.108	2.37894	135.583
864.26	2.37899	136.341
864.413	2.37904	137.515
864.565	2.37909	142.666
864.718	2.37913	139.038
864.87	2.37918	132.496
865.022	2.37923	129.497
865.175	2.37928	129.083
865.327	2.37932	135.403
865.48	2.37937	131.622
865.632	2.37942	126.578
865.784	2.37947	125.603
865.937	2.37951	127.971
866.089	2.37956	130.43
866.242	2.37961	131.342
866.394	2.37966	133.69
866.546	2.3797	133.799
866.699	2.37975	129.105
866.851	2.3798	124.65
867.004	2.37985	123.889
867.156	2.37989	127.17
867.308	2.37994	126.036
867.461	2.37999	127.993
867.613	2.38004	125.775
867.766	2.38008	127.301
867.918	2.38013	122.213
868.07	2.38018	117.498
868.223	2.38022	113.065
868.375	2.38027	110.195
868.528	2.38032	116.319
868.68	2.38037	121.033
868.832	2.38041	121.555
868.985	2.38046	119.363
869.137	2.38051	119.103
869.29	2.38056	127.451
869.442	2.3806	129.365
869.594	2.38065	131.083
869.747	2.3807	129.778
869.899	2.38075	124.449
870.052	2.38079	125.32
870.204	2.38084	124.537
870.356	2.38089	132.472
870.509	2.38094	130.146
870.661	2.38098	127.125
870.814	2.38103	125.757
870.966	2.38108	126.389
871.118	2.38113	125.104
871.271	2.38117	120.497
871.423	2.38122	122.797
871.576	2.38127	126.059
871.728	2.38132	128.536
871.88	2.38136	127.039
872.033	2.38141	124.801
872.185	2.38146	121.281
872.338	2.38151	118.782
872.49	2.38155	123.499
872.642	2.3816	127.823
872.795	2.38165	132.681
872.947	2.38169	128.115
873.1	2.38174	128.485
873.252	2.38179	128.343
873.404	2.38184	130.148
873.557	2.38188	125.343
873.709	2.38193	122.583
873.862	2.38198	123.778
874.014	2.38203	126.216
874.166	2.38207	132.107
874.319	2.38212	131.433
874.471	2.38217	134.366
874.624	2.38222	133.429
874.776	2.38226	134.808
874.928	2.38231	133.391
875.081	2.38236	130.283
875.233	2.38241	135.314
875.386	2.38245	141.796
875.538	2.3825	139.688
875.69	2.38255	134.453
875.843	2.3826	128.952
875.995	2.38264	130.8
876.148	2.38269	130.017
876.3	2.38274	133.324
876.452	2.38279	136.013
876.605	2.38283	133.666
876.757	2.38288	132.599
876.91	2.38293	134.06
877.062	2.38297	136.168
877.214	2.38302	139.796
877.367	2.38307	140.211
877.519	2.38312	143.58
877.672	2.38316	143.449
877.824	2.38321	144.102
877.976	2.38326	146.876
878.129	2.38331	145.08
878.281	2.38335	144.534
878.434	2.3834	135.129
878.586	2.38345	137.447
878.738	2.3835	137.471
878.891	2.38354	141.755
879.043	2.38359	139.297
879.196	2.38364	132.644
879.348	2.38369	130.537
879.5	2.38373	128.323
879.653	2.38378	128.323
879.805	2.38383	126.147
879.958	2.38388	121.19
880.11	2.38392	122.063
880.262	2.38397	124.912
880.415	2.38402	124.651
880.567	2.38407	121.149
880.72	2.38411	118.431
880.872	2.38416	119.273
881.024	2.38421	121.229
881.177	2.38426	123.511
881.329	2.3843	124.511
881.482	2.38435	122.444
881.634	2.3844	120.032
881.786	2.38444	120.668
881.939	2.38449	116.494
882.091	2.38454	113.996
882.244	2.38459	111.909
882.396	2.38463	122.211
882.548	2.38468	125.341
882.701	2.38473	131.341
882.853	2.38478	133.255
883.006	2.38482	142.667
883.158	2.38487	143.338
883.31	2.38492	144.641
883.463	2.38497	138.901
883.615	2.38501	138.208
883.768	2.38506	137.082
883.92	2.38511	135.887
884.072	2.38516	131.522
884.225	2.3852	124.197
884.377	2.38525	121.328
884.53	2.3853	122.303
884.682	2.38535	120.105
884.834	2.38539	118.671
884.987	2.38544	116.605
885.139	2.38549	115.3
885.292	2.38554	116.624
885.444	2.38558	111.649
885.596	2.38563	118.302
885.749	2.38568	121.412
885.901	2.38572	126.647
886.054	2.38577	121.884
886.206	2.38582	120.69
886.358	2.38587	124.212
886.511	2.38591	131.845
886.663	2.38596	134.735
886.816	2.38601	137.083
886.968	2.38606	135.517
887.12	2.3861	133.713
887.273	2.38615	132.777
887.425	2.3862	133.277
887.578	2.38625	135.126
887.73	2.38629	129.463
887.882	2.38634	127.507
888.035	2.38639	126.679
888.187	2.38644	128.713
888.34	2.38648	133.169
888.492	2.38653	138.279
888.644	2.38658	140.757
888.797	2.38663	137.865
888.949	2.38667	130.299
889.102	2.38672	126.386
889.254	2.38677	120.518
889.406	2.38682	121.41
889.559	2.38686	121.541
889.711	2.38691	123.366
889.864	2.38696	121.019
890.016	2.387	118.541
890.168	2.38722	117.758
890.321	2.38743	117.716
890.473	2.38763	119.914
890.626	2.38783	122.021
890.778	2.38804	123.888
890.93	2.38824	122.454
891.083	2.38844	125.976
891.235	2.38865	126.237
891.388	2.38885	129.757
891.54	2.38905	121.651
891.692	2.38926	123.113
891.845	2.38946	126.526
891.997	2.38966	128.893
892.15	2.38987	127.321
892.302	2.39007	119.736
892.454	2.39027	119.996
892.607	2.39048	119.454
892.759	2.39068	120.256
892.912	2.39088	117.368
893.064	2.39109	114.257
893.216	2.39129	116.609
893.369	2.39149	122.476
893.521	2.39169	122.737
893.674	2.3919	121.299
893.826	2.3921	118.189
893.978	2.3923	120.929
894.131	2.39251	125.184
894.283	2.39271	131.553
894.436	2.39291	132.054
894.588	2.39312	127.408
894.74	2.39332	122.343
894.893	2.39352	120.758
895.045	2.39373	123.498
895.198	2.39393	124.802
895.35	2.39413	124.04
895.502	2.39434	121.712
895.655	2.39454	117.388
895.807	2.39474	120.017
895.96	2.39495	119.736
896.112	2.39515	120.257
896.264	2.39535	126.234
896.417	2.39556	129.235
896.569	2.39576	133.924
896.722	2.39596	129.491
896.874	2.39617	132.491
897.026	2.39637	130.952
897.179	2.39657	133.322
897.331	2.39677	129.93
897.484	2.39698	126.519
897.636	2.39718	123.519
897.788	2.39738	117.5
897.941	2.39759	123.389
898.093	2.39779	127.665
898.246	2.39799	133.032
898.398	2.3982	132.727
898.55	2.3984	127.277
898.703	2.3986	128.582
898.855	2.39881	127.56
899.008	2.39901	129.648
899.16	2.39921	130.43
899.312	2.39942	134.864
899.465	2.39962	134.344
899.617	2.39982	130.28
899.77	2.40003	127.803
899.922	2.40023	133.932
900.074	2.40043	140.819
900.227	2.40064	141.34
900.379	2.40084	134.687
900.532	2.40104	133.035
900.684	2.40125	128.251
900.836	2.40145	129.924
900.989	2.40165	124.84
901.141	2.40185	128.06
901.294	2.40206	122.733
901.446	2.40226	126.7
901.598	2.40246	126.96
901.751	2.40267	130.613
901.903	2.40287	129.365
902.056	2.40307	130.697
902.208	2.40328	126.677
902.36	2.40348	122.496
902.513	2.40368	116.751
902.665	2.40389	119.315
902.818	2.40409	121.821
902.97	2.40429	126.756
903.122	2.4045	128.43
903.275	2.4047	128.039
903.427	2.4049	125.04
903.58	2.40511	128.669
903.732	2.40531	132.974
903.884	2.40551	133.777
904.037	2.40572	130.3
904.189	2.40592	125.343
904.342	2.40612	124.43
904.494	2.40633	124.02
904.646	2.40653	124.651
904.799	2.40673	122.545
904.951	2.40693	121.411
905.104	2.40714	120.553
905.256	2.40739	124.595
905.408	2.40763	122.749
905.561	2.40786	118.017
905.713	2.4081	115.43
905.866	2.40833	110.754
906.018	2.40857	110.362
906.17	2.4088	105.153
906.323	2.40904	108.265
906.475	2.40927	104.873
906.628	2.4095	98.8488
906.78	2.40974	90.6493
906.932	2.40997	93.4852
907.085	2.41021	97.1534
907.237	2.41044	105.372
907.39	2.41068	110.352
907.542	2.41091	113.631
907.694	2.41114	109.048
907.847	2.41138	103.738
907.999	2.41161	103.59
908.152	2.41185	109.196
908.304	2.41208	107.734
908.456	2.41232	106.672
908.609	2.41255	103.822
908.761	2.41279	112.13
908.914	2.41302	113.713
909.066	2.41326	115.67
909.218	2.41349	109.84
909.371	2.41372	108.265
909.523	2.41396	108.917
909.676	2.41419	114.376
909.828	2.41443	115.357
909.98	2.41466	111.965
910.133	2.4149	108.314
910.285	2.41513	110.064
910.438	2.41537	109.003
910.59	2.4156	110.587
910.742	2.41583	108.11
910.895	2.41607	106.317
911.047	2.4163	104.212
911.2	2.41654	105.635
911.352	2.41677	108.228
911.504	2.41701	104.186
911.657	2.41724	101.215
911.809	2.41748	101.067
911.962	2.41771	100.806
912.114	2.41794	104.336
912.266	2.41818	102.511
912.419	2.41841	106.831
912.571	2.41865	101.866
912.724	2.41888	103.01
912.876	2.41912	100.621
913.028	2.41935	108.521
913.181	2.41959	107.508
913.333	2.41982	109.766
913.486	2.42006	103.806
913.638	2.42029	101.85
913.79	2.42052	98.0508
913.943	2.42076	104.57
914.095	2.42099	106.412
914.248	2.42123	110.062
914.4	2.42146	105.927
914.552	2.4217	107.345
914.705	2.42193	108.537
914.857	2.42216	103.869
915.01	2.4224	104.93
915.162	2.42263	103.608
915.314	2.42287	103.806
915.467	2.4231	105.874
915.619	2.42334	104.801
915.772	2.42357	108.339
915.924	2.42381	105.097
916.076	2.42404	107.884
916.229	2.42428	103.302
916.381	2.42451	100.302
916.534	2.42474	101.148
916.686	2.42498	102.99
916.838	2.42521	105.973
916.991	2.42545	104.326
917.143	2.42568	109.022
917.296	2.42592	111.22
917.448	2.42615	109.412
917.6	2.42638	109.282
917.753	2.42662	109.971
917.905	2.42685	114.687
918.058	2.42709	119.623
918.21	2.42716	130.581
918.362	2.42728	139.381
918.515	2.4274	143.315
918.667	2.42752	141.205
918.82	2.42764	138.494
918.972	2.42776	138.033
919.124	2.42788	142.858
919.277	2.428	143.686
919.429	2.42812	145.083
919.582	2.42824	146.7
919.734	2.42835	150.827
919.886	2.42847	159.022
920.039	2.42859	155.995
920.191	2.42871	157.038
920.344	2.42883	154.272
920.496	2.42895	157.142
920.648	2.42907	157.012
920.801	2.42919	158.837
920.953	2.42931	159.333
921.106	2.42943	161.315
921.258	2.42955	158.733
921.41	2.42966	157.977
921.563	2.42978	158.108
921.715	2.4299	161.08
921.868	2.43002	160.298
922.02	2.43014	162.488
922.172	2.43026	162.645
922.325	2.43038	169.943
922.477	2.4305	169.971
922.63	2.43062	163.661
922.782	2.43074	158.32
922.934	2.43085	154.745
923.087	2.43097	163.484
923.239	2.43109	163.223
923.392	2.43121	163.536
923.544	2.43133	164.761
923.696	2.43145	163.691
923.849	2.43157	164.775
924.001	2.43169	158.122
924.154	2.43181	158.122
924.306	2.43193	161.734
924.458	2.43205	164.055
924.611	2.43216	165.228
924.763	2.43228	162.853
924.916	2.4324	166.924
925.068	2.43252	170.326
925.22	2.43264	173.093
925.373	2.43276	170.354
925.525	2.43288	165.257
925.678	2.433	167.605
925.83	2.43312	166.273
925.982	2.43324	170.532
926.135	2.43336	161.791
926.287	2.43347	157.619
926.44	2.43359	152.448
926.592	2.43371	153.622
926.744	2.43383	154.862
926.897	2.43395	154.887
927.049	2.43407	155.409
927.202	2.43419	154.43
927.354	2.43431	152.734
927.506	2.43443	150.491
927.659	2.43455	149.095
927.811	2.43466	155.618
927.964	2.43478	156.791
928.116	2.4349	155.734
928.268	2.43502	148.143
928.421	2.43514	149.056
928.573	2.43526	153.1
928.726	2.43538	152.08
928.878	2.4355	150.411
929.03	2.43562	149.863
929.183	2.43574	150.124
929.335	2.43586	150.687
929.488	2.43598	151.991
929.64	2.43609	151.339
929.792	2.43621	151.924
929.945	2.43633	148.925
930.097	2.43645	150.988
930.25	2.43657	153.753
930.402	2.43669	152.735
930.554	2.43681	155.269
930.707	2.43693	148.07
930.859	2.43705	147.157
931.012	2.43717	147.622
931.164	2.43728	154.402
931.316	2.4374	157.011
931.469	2.43752	154.664
931.621	2.43764	152.213
931.774	2.43776	150.728
931.926	2.43788	148.274
932.078	2.438	144.361
932.231	2.43812	141.671
932.383	2.43824	141.41
932.536	2.43836	142.429
932.688	2.43847	148.299
932.84	2.43859	151.666
932.993	2.43871	152.212
933.145	2.43883	147.977
933.298	2.43895	148.369
933.45	2.43907	145.606
933.602	2.43919	146.449
933.755	2.43931	142.407
933.907	2.43943	144.884
934.06	2.43955	143.368
934.212	2.43967	150.566
934.364	2.43978	144.851
934.517	2.4399	147.62
934.669	2.44002	140.422
934.822	2.44014	144.596
934.974	2.44026	142.015
935.126	2.44038	143.473
935.279	2.4405	150.36
935.431	2.44062	152.242
935.584	2.44074	149.871
935.736	2.44086	145.855
935.888	2.44097	146.058
936.041	2.44109	150.594
936.193	2.44121	147.072
936.346	2.44133	139.249
936.498	2.44145	132.649
936.65	2.44157	130.799
936.803	2.44169	137.161
936.955	2.44181	139.878
937.108	2.44193	141.205
937.26	2.44205	140.45
937.412	2.44217	138.135
937.565	2.44229	137.875
937.717	2.4424	135.811
937.87	2.44252	133.844
938.022	2.44264	132.777
938.174	2.44276	134.604
938.327	2.44288	139.43
938.479	2.443	139.617
938.632	2.44312	137.768
938.784	2.44324	134.746
938.936	2.44336	134.712
939.089	2.44348	131.844
939.241	2.44359	128.735
939.394	2.44371	127.408
939.546	2.44383	125.493
939.698	2.44395	126.553
939.851	2.44407	124.894
940.003	2.44419	126.371
940.156	2.44431	128.442
940.308	2.44443	126.32
940.46	2.44455	127.04
940.613	2.44467	128.182
940.765	2.44479	131.964
940.918	2.4449	128.943
941.07	2.44502	124.8
941.222	2.44514	123.236
941.375	2.44526	126.277
941.527	2.44538	126.779
941.68	2.4455	123.408
941.832	2.44562	120.012
941.984	2.44574	118.969
942.137	2.44586	122.621
942.289	2.44598	124.15
942.442	2.4461	126.909
942.594	2.44621	126.627
942.746	2.44633	128.974
942.899	2.44645	122.321
943.051	2.44657	124.104
943.204	2.44669	125.975
943.356	2.44681	128.6
943.508	2.44693	126.686
943.661	2.44705	117.662
943.813	2.44717	117.497
943.966	2.44729	115.102
944.118	2.4474	121.234
944.27	2.44752	121.885
944.423	2.44764	119.325
944.575	2.44776	118.522
944.728	2.44788	121.194
944.88	2.448	122.387
945.032	2.44812	120.973
945.185	2.44824	121.451
945.337	2.44836	123.648
945.49	2.44848	124.691
945.642	2.4486	125.974
945.794	2.44871	125.703
945.947	2.44883	127.53
946.099	2.44895	127.139
946.252	2.44907	135.884
946.404	2.44919	131.299
946.556	2.44931	130.232
946.709	2.44943	122.539
946.861	2.44955	128.451
947.014	2.44967	130.822
947.166	2.44979	129.21
947.318	2.4499	128.536
947.471	2.45002	124.885
947.623	2.45014	127.17
947.776	2.45026	125.062
947.928	2.45038	119.473
948.08	2.4505	117.048
948.233	2.45062	115.373
948.385	2.45074	120.962
948.538	2.45086	124.619
948.69	2.45098	128.141
948.842	2.4511	131.792
948.995	2.45121	127.69
949.147	2.45133	122.844
949.3	2.45145	119.914
949.452	2.45157	119.633
949.604	2.45169	120.155
949.757	2.45181	117.87
949.909	2.45193	118.02
950.062	2.45205	116.052
950.214	2.45236	117.788
950.366	2.45261	120.418
950.519	2.45287	123.389
950.671	2.45312	124
950.824	2.45337	120.848
950.976	2.45363	120.758
951.128	2.45388	119.454
951.281	2.45414	121.831
951.433	2.45439	118.683
951.586	2.45464	118.181
951.738	2.4549	116.848
951.89	2.45515	122.305
952.043	2.4554	121.001
952.195	2.45566	120.459
952.348	2.45591	115.169
952.5	2.45617	114.647
952.652	2.45642	115.43
952.805	2.45668	114.89
952.957	2.45693	115.02
953.11	2.45718	112.717
953.262	2.45744	112.978
953.414	2.45769	109.195
953.567	2.45795	106.43
953.719	2.4582	106.188
953.872	2.45845	106.971
954.024	2.45871	107.344
954.176	2.45896	104.083
954.329	2.45921	103.935
954.481	2.45947	104.978
954.634	2.45972	106.152
954.786	2.45998	106.3
954.938	2.46023	105.109
955.091	2.46048	108.761
955.243	2.46074	108.891
955.396	2.46099	106.709
955.548	2.46125	104.1
955.7	2.4615	103.97
955.853	2.46176	106.561
956.005	2.46201	104.753
956.158	2.46226	103.562
956.31	2.46252	102.145
956.462	2.46277	103.17
956.615	2.46303	107.245
956.767	2.46328	106.071
956.92	2.46353	103.984
957.072	2.46379	97.8389
957.224	2.46404	98.6216
957.377	2.46429	99.4041
957.529	2.46455	101.214
957.682	2.4648	100.3
957.834	2.46506	101.588
957.986	2.46531	101.632
958.139	2.46556	100.312
958.291	2.46582	97.4434
958.444	2.46607	100.378
958.596	2.46633	106.525
958.748	2.46658	114.478
958.901	2.46684	114.405
959.053	2.46709	114.31
959.206	2.46734	113.939
959.358	2.4676	110.773
959.51	2.46785	107.589
959.663	2.46811	98.8484
959.815	2.46836	99.1092
959.968	2.46861	100.756
960.12	2.46887	105.174
960.272	2.46912	107.409
960.425	2.46937	107.587
960.577	2.46963	103.41
960.73	2.46988	104.845
960.882	2.47014	103.037
961.034	2.47039	108.387
961.187	2.47065	102.517
961.339	2.4709	100.933
961.492	2.47115	99.3682
961.644	2.47141	103.804
961.796	2.47166	104.18
961.949	2.47192	105.372
962.101	2.47217	104.98
962.254	2.47242	105.649
962.406	2.47268	105.704
962.558	2.47293	105.444
962.711	2.47319	111.05
962.863	2.47344	108.386
963.016	2.47369	110.845
963.168	2.47395	106.021
963.32	2.4742	106.021
963.473	2.47445	102.704
963.625	2.47471	103.463
963.778	2.47496	106.072
963.93	2.47522	103.408
964.082	2.47547	102.358
964.235	2.47573	104.184
964.387	2.47598	109.253
964.54	2.47623	110.735
964.692	2.47649	104.849
964.844	2.47674	104.067
964.997	2.477	107.197
965.149	2.47725	107.849
965.302	2.47726	108.762
965.454	2.47739	108.24
965.606	2.47752	114.257
965.759	2.47765	115.45
965.911	2.47777	118.038
966.064	2.4779	114.386
966.216	2.47803	113.89
966.368	2.47816	115.194
966.521	2.47829	118.325
966.673	2.47842	121.279
966.826	2.47855	125.321
966.978	2.47868	131.653
967.13	2.47881	133.239
967.283	2.47894	130.393
967.435	2.47907	131.495
967.588	2.4792	130.729
967.74	2.47933	130.729
967.892	2.47946	130.967
968.045	2.47959	134.343
968.197	2.47972	134.321
968.35	2.47985	130.604
968.502	2.47998	130.843
968.654	2.48011	134.494
968.807	2.48024	138.363
968.959	2.48037	142.74
969.112	2.4805	137.285
969.264	2.48062	132.307
969.416	2.48075	130.431
969.569	2.48088	138.03
969.721	2.48101	144.81
969.874	2.48114	146.873
970.026	2.48127	144.883
970.178	2.4814	147.205
970.331	2.48153	147.858
970.483	2.48166	150.833
970.636	2.48179	154.405
970.788	2.48192	150.777
970.94	2.48205	150.769
971.093	2.48218	148.812
971.245	2.48231	146.964
971.398	2.48244	143.06
971.55	2.48257	140.581
971.702	2.4827	147.987
971.855	2.48283	147.075
972.007	2.48296	145.094
972.16	2.48309	136.291
972.312	2.48322	133.053
972.464	2.48334	134.772
972.617	2.48347	135.67
972.769	2.4836	136.561
972.922	2.48373	132.387
973.074	2.48386	136.798
973.226	2.48399	136.037
973.379	2.48412	134.841
973.531	2.48425	130.371
973.684	2.48438	131.393
973.836	2.48451	134.937
973.988	2.48464	136.692
974.141	2.48477	136.713
974.293	2.4849	130.273
974.446	2.48503	128.185
974.598	2.48516	130.664
974.75	2.48529	135.778
974.903	2.48542	135.778
975.055	2.48555	140.013
975.208	2.48568	144.341
975.36	2.48581	149.665
975.512	2.48594	148.666
975.665	2.48607	143.839
975.817	2.48619	147.958
975.97	2.48632	149.407
976.122	2.48645	148.363
976.274	2.48658	144.766
976.427	2.48671	140.863
976.579	2.48684	145.144
976.732	2.48697	141.866
976.884	2.4871	140.301
977.036	2.48723	143.56
977.189	2.48736	146.553
977.341	2.48749	143.03
977.494	2.48762	134.055
977.646	2.48775	128.886
977.798	2.48788	132.148
977.951	2.48801	135.516
978.103	2.48814	135.038
978.256	2.48827	132.799
978.408	2.4884	129.561
978.56	2.48853	130.017
978.713	2.48866	124.429
978.865	2.48879	125.581
979.018	2.48892	119.322
979.17	2.48904	127.28
979.322	2.48917	124.562
979.475	2.4893	128.431
979.627	2.48943	127.626
979.78	2.48956	129.191
979.932	2.48969	131.321
980.084	2.48982	129.756
980.237	2.48995	128.843
980.389	2.49008	126.386
980.542	2.49021	122.572
980.694	2.49034	128.181
980.846	2.49047	129.094
980.999	2.4906	129.278
981.151	2.49073	121.059
981.304	2.49086	122.755
981.456	2.49099	126.93
981.608	2.49112	124.302
981.761	2.49125	119.203
981.913	2.49138	118.16
982.066	2.49151	126.505
982.218	2.49164	130.408
982.37	2.49176	132.082
982.523	2.49189	125.712
982.675	2.49202	124.429
982.828	2.49215	118.059
982.98	2.49228	118.711
983.132	2.49241	117.386
983.285	2.49254	119.735
983.437	2.49267	121.13
983.59	2.4928	124.129
983.742	2.49293	124.891
983.894	2.49306	124.332
984.047	2.49319	122.768
984.199	2.49332	119.769
984.352	2.49345	119.193
984.504	2.49358	113.344
984.656	2.49371	112.702
984.809	2.49384	109.571
984.961	2.49397	112.422
985.114	2.4941	109.169
985.266	2.49428	110.081
985.418	2.49445	107.051
985.571	2.49461	107.816
985.723	2.49477	106.679
985.876	2.49493	108.293
986.028	2.4951	110.659
986.18	2.49526	106.579
986.333	2.49542	104.231
986.485	2.49558	101.735
986.638	2.49575	109.432
986.79	2.49591	111.91
986.942	2.49607	113.345
987.095	2.49623	108.109
987.247	2.4964	113.719
987.4	2.49656	116.718
987.552	2.49672	120.108
987.704	2.49688	113.398
987.857	2.49705	113.808
988.009	2.49721	112.392
988.162	2.49737	117.407
988.314	2.49753	109.03
988.466	2.4977	106.862
988.619	2.49786	103.245
988.771	2.49802	110.578
988.924	2.49819	117.161
989.076	2.49835	114.255
989.228	2.49851	115.781
989.381	2.49867	108.366
989.533	2.49884	110.844
989.686	2.499	107.435
989.838	2.49916	109.653
989.99	2.49932	106.131
990.143	2.49949	104.735
990.295	2.49965	104.978
990.448	2.49981	104.065
990.6	2.49997	104.587
990.752	2.50014	100.598
990.905	2.5003	104.102
991.057	2.50046	105.536
991.21	2.50062	110.326
991.362	2.50079	114.518
991.514	2.50095	114.397
991.667	2.50111	113.857
991.819	2.50127	108.639
991.972	2.50144	107.587
992.124	2.5016	109.431
992.276	2.50176	108.631
992.429	2.50192	108.388
992.581	2.50209	104.651
992.734	2.50225	110.91
992.886	2.50241	108.317
993.038	2.50257	110.21
993.191	2.50274	109.317
993.343	2.5029	111.257
993.496	2.50306	114.015
993.648	2.50322	108.779
993.8	2.50339	108.127
993.953	2.50355	104.474
994.105	2.50371	103.17
994.258	2.50388	107.586
994.41	2.50404	109.525
994.562	2.5042	107.976
994.715	2.50436	104.082
994.867	2.50452	101.1
995.02	2.50469	103.187
995.172	2.50485	104.083
995.324	2.50501	105.824
995.477	2.50518	108.564
995.629	2.50534	108.303
995.782	2.5055	106.431
995.934	2.50566	107.437
996.086	2.50583	106.02
996.239	2.50599	104.678
996.391	2.50615	102.237
996.544	2.50631	109.151
996.696	2.50648	112.189
996.848	2.50664	112.692
997.001	2.5068	112.811
997.153	2.50696	113.445
997.306	2.50713	113.202
997.458	2.50729	107.456
997.61	2.50745	108.369
997.763	2.50761	109.916
997.915	2.50778	113.717
998.068	2.50794	112.994
998.22	2.5081	113.926
998.372	2.50826	111.679
998.525	2.50843	115.661
998.677	2.50859	113.835
998.83	2.50875	114.758
998.982	2.50891	107.213
999.134	2.50908	112.41
999.287	2.50924	115.278
999.439	2.5094	118.893
999.592	2.50956	116.957
999.744	2.50973	111.107
999.896	2.50989	113.363
1000.05	2.51005	110.623
1000.2	2.5103	118.038
1000.35	2.51052	116.48
1000.51	2.51077	120.655
1000.66	2.51099	118.458
1000.81	2.51122	121.972
1000.96	2.51144	125.142
1001.12	2.51168	125.533
1001.27	2.51191	126.816
1001.42	2.51213	123.647
1001.57	2.51235	127.169
1001.73	2.5126	125.975
1001.88	2.51282	128.493
1002.03	2.51305	127.819
1002.18	2.51327	131.904
1002.33	2.51349	132.495
1002.49	2.51374	139.536
1002.64	2.51396	142.513
1002.79	2.51418	145.531
1002.94	2.51441	146.078
1003.1	2.51465	150.511
1003.25	2.51488	159.022
1003.4	2.5151	164.995
1003.55	2.51532	166.456
1003.71	2.51557	168.285
1003.86	2.51579	161.765
1004.01	2.51601	167.766
1004.16	2.51624	162.622
1004.32	2.51648	166.788
1004.47	2.51671	164.541
1004.62	2.51693	169.916
1004.77	2.51715	174.516
1004.93	2.5174	178.719
1005.08	2.51762	172.196
1005.23	2.51784	166.56
1005.38	2.51807	160.01
1005.54	2.51831	164.576
1005.69	2.51854	169.664
1005.84	2.51876	169.953
1005.99	2.51898	166.926
1006.14	2.51921	165.489
1006.3	2.51945	163.114
1006.45	2.51967	164.966
1006.6	2.5199	167.734
1006.75	2.52013	167.005
1006.91	2.52037	166.847
1007.06	2.52059	161.21
1007.21	2.52081	163.416
1007.36	2.52104	160.025
1007.52	2.52128	157.287
1007.67	2.5215	153.36
1007.82	2.52173	153.335
1007.97	2.52196	155.709
1008.13	2.5222	162.362
1008.28	2.52242	163.56
1008.43	2.52264	154.843
1008.58	2.52287	144.905
1008.74	2.52311	144.018
1008.89	2.52333	145.016
1009.04	2.52356	141.719
1009.19	2.52379	135.718
1009.35	2.52403	135.197
1009.5	2.52425	136.929
1009.65	2.52447	141.339
1009.8	2.5247	149.58
1009.95	2.52493	162.649
1010.11	2.52516	166.767
1010.26	2.52539	170.42
1010.41	2.52562	167.392
1010.56	2.52584	167.531
1010.72	2.52608	164.792
1010.87	2.5263	168.573
1011.02	2.52653	171.123
1011.17	2.52676	171.747
1011.33	2.52699	165.277
1011.48	2.52722	165.901
1011.63	2.52745	166.711
1011.78	2.52767	162.906
1011.94	2.52791	158.782
1012.09	2.52813	158.494
1012.24	2.52836	160.059
1012.39	2.52859	156.49
1012.55	2.52882	156.306
1012.7	2.52905	157.741
1012.85	2.52928	159.306
1013	2.5295	162.097
1013.16	2.52974	164.159
1013.31	2.52996	164.681
1013.46	2.53019	153.752
1013.61	2.53042	158.212
1013.76	2.53064	162.911
1013.92	2.53088	172.886
1014.07	2.53111	168.286
1014.22	2.53133	166.456
1014.37	2.53156	163.656
1014.53	2.53179	163.663
1014.68	2.53202	160.712
1014.83	2.53225	159.12
1014.98	2.53247	158.99
1015.14	2.53271	159.88
1015.29	2.53294	159.78
1015.44	2.53316	162.314
1015.59	2.53339	165.548
1015.75	2.53362	165.153
1015.9	2.53385	163.27
1016.05	2.53408	156.123
1016.2	2.5343	159.748
1016.36	2.53454	154.011
1016.51	2.53477	156.754
1016.66	2.53499	157.015
1016.81	2.53522	157.822
1016.97	2.53545	155.576
1017.12	2.53568	153.023
1017.27	2.53591	152.762
1017.42	2.53613	153.052
1017.57	2.53635	149.868
1017.73	2.5366	152.738
1017.88	2.53682	148.168
1018.03	2.53705	144.381
1018.18	2.53727	138.641
1018.34	2.53751	143.052
1018.49	2.53774	145.013
1018.64	2.53796	144.1
1018.79	2.53818	140.791
1018.95	2.53843	137.424
1019.1	2.53865	136.097
1019.25	2.53888	132.647
1019.4	2.5391	134.711
1019.56	2.53934	130.95
1019.71	2.53957	131.19
1019.86	2.53979	121.821
1020.01	2.54001	124.669
1020.17	2.5403	124.017
1020.32	2.54056	128.322
1020.47	2.54082	126.496
1020.62	2.54108	129.52
1020.78	2.54136	129.259
1020.93	2.54163	132.671
1021.08	2.54189	130.952
1021.23	2.54215	130.3
1021.38	2.54242	125.453
1021.54	2.5427	122.537
1021.69	2.54296	117.562
1021.84	2.54322	115.475
1021.99	2.54348	112.151
1022.15	2.54376	114.926
1022.3	2.54403	116.902
1022.45	2.54429	115.858
1022.6	2.54455	109.58
1022.76	2.54483	108.256
1022.91	2.54509	111.506
1023.06	2.54535	117.246
1023.21	2.54562	118.68
1023.37	2.5459	117.628
1023.52	2.54616	116.609
1023.67	2.54642	113.368
1023.82	2.54669	115.736
1023.98	2.54697	113.606
1024.13	2.54723	115.582
1024.28	2.54749	115.301
1024.43	2.54775	116.473
1024.59	2.54803	120.106
1024.74	2.5483	117.107
1024.89	2.54856	113.866
1025.04	2.54882	109.233
1025.19	2.54908	113.124
1025.35	2.54936	115.864
1025.5	2.54962	117.105
1025.65	2.54989	114.648
1025.8	2.55015	120.063
1025.96	2.55043	124.237
1026.11	2.55069	127.236
1026.26	2.55096	127.692
1026.41	2.55122	121.578
1026.57	2.5515	121.557
1026.72	2.55176	120.101
1026.87	2.55202	122.171
1027.02	2.55228	123.605
1027.18	2.55257	121.277
1027.33	2.55283	122.024
1027.48	2.55309	125.696
1027.63	2.55335	129.631
1027.79	2.55363	129.777
1027.94	2.55389	129.67
1028.09	2.55416	131.695
1028.24	2.55425	137.041
1028.4	2.55442	137.563
1028.55	2.55458	144.101
1028.7	2.55474	145.144
1028.85	2.55489	145.512
1029	2.55505	137.319
1029.16	2.55522	138.125
1029.31	2.55538	143.65
1029.46	2.55553	147.279
1029.61	2.55569	142.844
1029.77	2.55586	136.429
1029.92	2.55602	133.583
1030.07	2.55617	134.887
1030.22	2.55633	131.735
1030.38	2.5565	132.626
1030.53	2.55666	133.278
1030.68	2.55681	134.06
1030.83	2.55697	135.801
1030.99	2.55714	133.302
1031.14	2.5573	132.149
1031.29	2.55745	131.06
1031.44	2.55761	132.727
1031.6	2.55778	137.032
1031.75	2.55794	143.03
1031.9	2.55809	146.318
1032.05	2.55825	144.491
1032.21	2.55842	135.844
1032.36	2.55858	134.824
1032.51	2.55874	138.657
1032.66	2.55889	139.309
1032.81	2.55905	137.874
1032.97	2.55922	134.019
1033.12	2.55938	139.3
1033.27	2.55953	140.19
1033.42	2.55969	139.958
1033.58	2.55986	136.413
1033.73	2.56002	134.218
1033.88	2.56017	135.624
1034.03	2.56033	138.454
1034.19	2.5605	143.281
1034.34	2.56066	139.26
1034.49	2.56081	134.083
1034.64	2.56097	127.772
1034.8	2.56114	129.338
1034.95	2.5613	136.639
1035.1	2.56146	140.272
1035.25	2.56161	138.667
1035.41	2.56178	130.192
1035.56	2.56194	127.956
1035.71	2.5621	131.194
1035.86	2.56225	142.303
1036.02	2.56242	140.694
1036.17	2.56258	145.421
1036.32	2.56274	136.267
1036.47	2.56289	140.95
1036.62	2.56305	137.178
1036.78	2.56322	136.938
1036.93	2.56338	134.703
1037.08	2.56353	131.681
1037.23	2.56369	136.988
1037.39	2.56386	137.28
1037.54	2.56402	139.603
1037.69	2.56417	133.796
1037.84	2.56433	134.761
1038	2.5645	134.546
1038.15	2.56466	138.96
1038.3	2.56481	140.777
1038.45	2.56497	139.473
1038.61	2.56514	137.792
1038.76	2.5653	136.292
1038.91	2.56546	138.09
1039.06	2.56561	137.292
1039.22	2.56578	140.749
1039.37	2.56594	143.041
1039.52	2.5661	147.612
1039.67	2.56625	143.373
1039.83	2.56642	141.919
1039.98	2.56658	141.131
1040.13	2.56674	139.362
1040.28	2.56689	138.42
1040.43	2.56705	136.693
1040.59	2.56722	140.679
1040.74	2.56738	141.76
1040.89	2.56753	141.139
1041.04	2.56769	137.596
1041.2	2.56786	135.78
1041.35	2.56802	139.302
1041.5	2.56818	142.086
1041.65	2.56833	143.734
1041.81	2.5685	138.178
1041.96	2.56866	138.96
1042.11	2.56882	140.134
1042.26	2.56897	139.994
1042.42	2.56914	137.232
1042.57	2.5693	136.343
1042.72	2.56946	134.666
1042.87	2.56961	139.566
1043.03	2.56978	137.763
1043.18	2.56994	146.566
1043.33	2.5701	143.23
1043.48	2.57025	145.756
1043.64	2.57042	138.351
1043.79	2.57058	136.656
1043.94	2.57074	134.165
1044.09	2.57089	137.485
1044.24	2.57105	141.118
1044.4	2.57122	137.277
1044.55	2.57138	130.743
1044.7	2.57153	127.694
1044.85	2.57169	131.216
1045.01	2.57186	133.032
1045.16	2.57202	130.232
1045.31	2.57218	128.291
1045.46	2.57233	126.533
1045.62	2.5725	125.116
1045.77	2.57266	130.816
1045.92	2.57282	130.618
1046.07	2.57297	135.816
1046.23	2.57314	128.322
1046.38	2.5733	129.694
1046.53	2.57346	127.431
1046.68	2.57361	125.557
1046.84	2.57378	125.303
1046.99	2.57394	125.349
1047.14	2.5741	125.244
1047.29	2.57425	125.105
1047.45	2.57442	120.3
1047.6	2.57458	120.838
1047.75	2.57474	117.448
1047.9	2.5749	117.036
1048.05	2.57505	116.212
1048.21	2.57505	124.237
1048.36	2.57508	122.804
1048.51	2.57512	118.899
1048.66	2.57515	113.307
1048.82	2.57519	114.35
1048.97	2.57522	117.453
1049.12	2.57525	118.409
1049.27	2.57529	122.451
1049.43	2.57532	122.601
1049.58	2.57536	117.907
1049.73	2.57539	116.469
1049.88	2.57543	119.229
1050.04	2.57546	118.753
1050.19	2.5755	114.193
1050.34	2.57553	112.372
1050.49	2.57557	117.123
1050.65	2.5756	120.664
1050.8	2.57564	119.184
1050.95	2.57567	117.647
1051.1	2.5757	113.063
1051.26	2.57574	113.984
1051.41	2.57578	115.421
1051.56	2.57581	116.874
1051.71	2.57584	113.493
1051.86	2.57588	110.799
1052.02	2.57591	113.713
1052.17	2.57595	120.606
1052.32	2.57598	121.343
1052.47	2.57602	123.104
1052.63	2.57605	116.099
1052.78	2.57609	122.361
1052.93	2.57612	118.952
1053.08	2.57615	124.413
1053.24	2.57619	120.09
1053.39	2.57623	124.825
1053.54	2.57626	126.21
1053.69	2.57629	131.055
1053.85	2.57633	128.108
1054	2.57636	127.244
1054.15	2.5764	121.379
1054.3	2.57643	119.76
1054.46	2.57647	120.064
1054.61	2.5765	126.82
1054.76	2.57654	125.924
1054.91	2.57657	126.01
1055.07	2.57661	122.49
1055.22	2.57664	125.864
1055.37	2.57667	120.608
1055.52	2.57671	121.934
1055.67	2.57674	120.376
1055.83	2.57678	122.632
1055.98	2.57681	118.046
1056.13	2.57685	119.584
1056.28	2.57688	117.217
1056.44	2.57692	121.921
1056.59	2.57695	114.49
1056.74	2.57699	114.659
1056.89	2.57702	105.479
1057.05	2.57706	107.672
1057.2	2.57709	106.629
1057.35	2.57713	106.211
1057.5	2.57716	107.892
1057.66	2.5772	112.748
1057.81	2.57723	112.897
1057.96	2.57726	112.339
1058.11	2.5773	110.807
1058.27	2.57733	114.067
1058.42	2.57737	114.629
1058.57	2.5774	111.725
1058.72	2.57744	117.254
1058.88	2.57747	118.519
1059.03	2.57751	117.75
1059.18	2.57754	117.247
1059.33	2.57757	116.263
1059.48	2.57761	123.477
1059.64	2.57765	119.258
1059.79	2.57768	124.295
1059.94	2.57771	119.611
1060.09	2.57775	118.112
1060.25	2.57778	113.183
1060.4	2.57782	113.91
1060.55	2.57785	114.491
1060.7	2.57789	114.379
1060.86	2.57792	115.864
1061.01	2.57796	119.614
1061.16	2.57799	119.357
1061.31	2.57802	118.832
1061.47	2.57806	114.332
1061.62	2.5781	114.177
1061.77	2.57813	110.545
1061.92	2.57816	117.351
1062.08	2.5782	119.475
1062.23	2.57823	124.551
1062.38	2.57827	121.007
1062.53	2.5783	124.151
1062.69	2.57834	126.787
1062.84	2.57837	128.755
1062.99	2.57841	133.372
1063.14	2.57844	130.702
1063.29	2.57848	126.128
1063.45	2.57851	119.017
1063.6	2.57855	122.464
1063.75	2.57858	129.794
1063.9	2.57861	137.863
1064.06	2.57865	133.601
1064.21	2.57868	128.967
1064.36	2.57872	119.323
1064.51	2.57875	122.798
1064.67	2.57879	125.857
1064.82	2.57882	126.479
1064.97	2.57886	121.23
1065.12	2.57889	120.702
1065.28	2.57893	125.854
1065.43	2.57896	127.601
1065.58	2.579	123.361
1065.73	2.57903	121.545
1065.89	2.57907	122.029
1066.04	2.5791	124.863
1066.19	2.57913	123.529
1066.34	2.57917	120.394
1066.5	2.5792	121.147
1066.65	2.57924	122.045
1066.8	2.57927	129.38
1066.95	2.57931	129.026
1067.1	2.57934	131.562
1067.26	2.57938	127.1
1067.41	2.57941	125.857
1067.56	2.57945	122.05
1067.71	2.57948	120.081
1067.87	2.57952	119.518
1068.02	2.57955	122.757
1068.17	2.57958	124.877
1068.32	2.57962	130.784
1068.48	2.57965	130.281
1068.63	2.57969	133.304
1068.78	2.57972	126.014
1068.93	2.57976	122.751
1069.09	2.57979	118.021
1069.24	2.57983	122.615
1069.39	2.57986	119.986
1069.54	2.5799	123.137
1069.7	2.57993	117.396
1069.85	2.57997	120.511
1070	2.58	118.147
1070.15	2.58137	116.862
1070.31	2.58282	115.832
1070.46	2.58419	113.057
1070.61	2.58556	112.232
1070.76	2.58692	111.576
1070.91	2.58829	108.147
1071.07	2.58974	104.842
1071.22	2.59111	101.867
1071.37	2.59248	109.102
1071.52	2.59384	110.956
1071.68	2.5953	108.682
1071.83	2.59667	107.235
1071.98	2.59803	108.399
1072.13	2.5994	109.055

## Sheet: TOC Alkanes
Core	Depth splice (mbsl)	Age (Ma)	TOC (%)	CPI	ACL27-33	ng Odd Alk 27-33/g sed	C23+25 (Sphagnum)
A15-3	890.8	2.3881	0.418188	3.87547	29.5553	2032.41	0.356436
A15-3	890.81	2.3881	0.418188	3.83443	29.5136	2261.61	0.39382
A15-3	891.75	2.3893	0.474734	3.1288	29.517	2183.9	0.413065
A15-3	892.8	2.3907	0.447247	3.19242	29.6075	2559.04	0.395635
A15-3	893.8	2.3921	0.527786	2.9299	29.5626	2810.85	0.406278
A15-3	896.8	2.3961	0.526535	3.91462	29.6123	2152.4	0.264137
A15-3	897.8	2.3974	0.472495	2.86345	30.1342	3274.74	0.406924
A15-3	898.8	2.3987	0.459943	3.72518	29.5764	2505.27	0.341873
A15-3	898.81	2.3987	0.459943	3.78001	29.2608	1812.7	0.409083
A15-3	899.8	2.4001	0.518608	3.1236	29.5473	3423.22	0.404223
A15-3	901.8	2.4027	0.431862	2.88539	29.6593	1644.61	0.410148
A15-3	903.85	2.4055	0.653253	2.98146	29.8122	2973.79	0.36202
A15-3	904.8	2.4067	0.814745	2.89285	29.5682	3658.99	0.426108
A15-4	907.8	2.4113	0.946319	3.87447	29.715	1854.72	0.244559
A15-4	908.966	2.4131	0.761037	3.70993	29.7427	1489.7	0.201125
A15-4	909.526	2.414	0.833598	4.28558	29.8239	1616.77	0.148134
A15-4	910.005	2.4147	0.926554	4.70542	29.7486	1668.47	0.120568
A15-4	911.061	2.4163	0.730861	4.64038	30.13	961.349	0.111553
A15-4	912.188	2.4181	0.718898	3.54184	29.7284	1682.61	0.20729
A15-4	913.214	2.4196	0.917123	3.65576	29.6668	1534.75	0.222967
A15-3	917.55	2.4263	0.515429	4.41416	29.5708	1029.32	0.198514
A15-3	918.15	2.4271	0.523526	4.16837	29.3272	1490.76	0.27005
A15-3	920	2.4286	0.347104	4.38243	29.3701	1517.27	0.349641
A15-3	921.95	2.4301	0.366371	4.41455	29.3905	1696.31	0.363157
A15-4	922.8	2.4308	0.446496	5.67323	29.9522	267.747	0.155957
A15-4	923.45	2.4313	...	4.27372	29.4894	516.752	0.236221
A15-3	924	2.4317	0.363528	4.36907	29.31	1112.67	0.330304
A15-3	925	2.4325	0.349757	4.19336	29.434	1359.31	0.326939
A15-3	926.7	2.4338	0.245344	4.49062	29.4294	940.236	0.35948
A15-3	929.95	2.4363	0.227676	4.18842	29.2815	1005.1	0.383527
A15-3	935.9	2.441	0.2898	4.10622	29.4477	1270.9	0.333116
A15-3	936.9	2.4418	0.300253	3.89216	29.5066	1458.13	0.360704
A15-3	938.9	2.4433	0.346048	3.71623	29.5085	1308.03	0.3608
A15-3	940.9	2.4449	0.411291	3.71797	29.5224	1574.94	0.36302
A15-3	942.9	2.4465	0.413647	3.43897	29.6116	1614.02	0.360193
A15-3	943.85	2.4472	0.393816	3.30933	29.55	1612.61	0.378276
A15-3	944.9	2.448	0.500261	2.96999	29.6105	2206.5	0.369334
A15-3	945.9	2.4488	0.415037	2.96848	29.6063	2091.85	0.398704
A15-3	946.91	2.4496	0.485807	2.7849	29.7057	3104.47	0.409534
A15-3	953.25	2.4574	0.850463	3.0854	29.7474	3673.11	0.346989
A15-3	954.15	2.4589	0.882688	3.0216	29.7344	3432.33	0.372681
A15-3	956.18	2.4623	1.01668	3.00605	29.6578	2550.05	0.357624
A15-3	957.3	2.4642	0.854141	3.41845	29.5524	2120.96	0.318118
A15-3	958.25	2.4658	0.776641	3.74284	29.6156	1436	0.290858
A15-4	960.1	2.4688	0.710625	3.51333	29.9089	1314.93	0.267904
A15-3	960.33	2.4692	0.994048	3.40611	29.6769	2284.29	0.168977
A15-4	961.1	2.4705	0.754063	3.34321	29.8034	1540.05	0.259581
A15-4	961.8	2.4717	0.63331	4.28691	29.6486	1441	0.210778
A15-3	962.2	2.4723	0.709936	4.39992	29.8132	1284.19	0.171505
A15-4	962.45	2.4728	0.694371	3.86749	29.7308	1779.42	0.189602
A15-4	963.17	2.474	0.867228	3.63773	29.9394	1252.11	0.203902
A15-3	963.3	2.4742	0.642628	3.55795	29.6871	2030.6	0.211261
A15-4	963.85	2.4751	0.665976	3.68595	29.6651	2126.15	0.251416
A15-3	964.02	2.4754	0.916803	3.98996	29.8742	1493.03	0.262984
A15-4	965.8	2.4777	0.516682	4.5376	29.5756	2260.8	0.194688
A15-4	966.8	2.4785	0.482259	4.49163	29.7047	1585.51	0.247103
A15-4	968.5	2.48	0.518865	4.0753	29.5407	2014.83	0.204578
A15-4	969.5	2.4808	0.537164	3.51067	29.5167	1875.39	0.257311
A15-4	971.064	2.4822	0.553486	3.91548	29.563	2062.82	0.32896
A15-4	972	2.483	0.484869	4.15208	29.7471	2271.81	0.318409
A15-4	981.907	2.4914	0.775897	2.89221	29.748	2973.33	0.206195
A15-4	983.767	2.493	0.877548	3.06021	29.7784	2685.3	0.369739
A15-4	987.488	2.4967	0.906309	4.06974	29.6621	1888.31	0.355325
A15-4	991.437	2.5009	0.910961	4.23635	29.6619	399.923	0.222587
A15-4	991.721	2.5012	0.992033	3.49625	29.7788	1621.04	0.202364
A15-4	992.094	2.5016	0.854579	4.34271	29.4529	582.748	0.224172
A15-4	994.465	2.5041	0.871562	3.794	29.7195	1464.87	0.238653
A15-4	997.256	2.5071	0.980973	3.28054	29.6858	2214.83	0.215371
A15-4	1037.69	2.5642	0.530637	5.21331	30.2943	232.375	0.291931
A15-4	1040	2.5666	0.451681	3.85305	29.5655	925.026	0.165973
A15-4	1042.31	2.569	0.554728	3.50719	29.7084	2424.44	0.294613
A15-4	1044.62	2.5715	0.635459	3.53839	29.3797	1375.65	0.266023
A15-4	1046.92	2.5739	0.917677	2.98794	29.4331	2312.14	0.361428
A15-4	1049.23	2.5753	1.02944	3.43612	29.4647	1576.98	0.330991
A15-4	1051.54	2.5758	0.811483	3.91544	29.4167	481.479	0.273834
A15-4	1053.08	2.5762	1.01702	3.31277	29.4933	1686.36	0.2794
A15-4	1053.85	2.5763	0.95885	3.40743	29.3575	1623.27	0.286789
A15-4	1054.62	2.5765	1.10512	3.4036	29.4815	1470.85	0.299391
A15-4	1056.15	2.5769	1.03605	4.4232	29.5969	688.052	0.273739
A15-4	1057.62	2.5772	0.89228	3.28375	29.4636	1420.09	0.218789

## Sheet: brGDGT
Depth (mbsl)	Splice depth (mbsl)	Sediment (g)	brGDGT conc. (ng/g sed)		BIT	MATmr	CBT'	pH	#rings tetra
890.8	890.8	10	223		0.79	10.2	-0.8	5.9	0.17
898.8	898.8	9.3	155		0.58	11.6	-0.75	6	0.22
899.8	899.8	9.8	254		0.69	11.2	-0.85	5.8	0.21
901.8	901.8	9.8	197		0.67	10.6	-0.96	5.6	0.18
903.85	903.9	9.9	227		0.68	11.1	-0.98	5.6	0.17
904.8	904.8	10	326		0.64	12.6	-0.79	5.9	0.2
925.45	907.8	10	24		0.12	13.3	-0.41	6.5	0.24
926.8	908.97	10.3	34		0.23	6.6	-0.79	5.9	0.16
920	920	10	134		0.52	11.5	-0.69	6.1	0.22
921.95	922	10	119		0.63	12.1	-0.77	5.9	0.13
937.8	922.8	10.9	229		0.7	7.7	-0.63	6.1	0.24
938.45	923.5	9.1	204		0.45	10.5	-0.58	6.2	0.28
924	924	9.8	63		0.46	9.1	-0.63	6.2	0.25
925	925	10.1	75		0.48	10.6	-0.64	6.1	0.24
926.7	926.7	10.2	49		0.49	10.1	-0.71	6	0.2
929.95	930	9.9	43		0.5	9.2	-0.73	6	0.22
935.9	935.9	10.3	76		0.52	12.9	-0.67	6.1	0.18
936.9	936.9	10.2	48		0.51	9.8	-0.72	6	0.24
938.9	938.9	10.1	39		0.36	12	-0.66	6.1	0.23
940.9	940.9	9.8	57		0.32	12	-0.55	6.3	0.31
942.9	942.9	10.2	27		0.31	11	-0.66	6.1	0.29
953.25	953.3	10	25		0.51	5.3	-0.99	5.6	0.15
954.15	954.2	10	173		0.46	13	-0.65	6.1	0.22
956.18	956.2	9.9	176		0.37	8.2	-0.83	5.8	0.2
957.3	957.3	10	182		0.36	7	-0.77	5.9	0.21
960.33	960.33	10.3	97		0.23	14.5	-0.52	6.3	0.2
962.2	962.2	10.3	31		0.09	13.6	-0.29	6.7	0.34
963.17	963.2	10.1	80		0.22	14.3	-0.54	6.3	0.23
975.1	960.1	10.1	55		0.16	11.4	0.29	7.6	0.3
978.85	963.9	10.2	244		0.36	10.5	-0.61	6.2	0.27
964.02	964	10	49		0.16	16.6	-0.48	6.4	0.23
980.8	965.8	10.1	198		0.79	10.1	-0.82	5.8	0.18
981.8	966.8	10.2	52		0.43	9.6	-0.68	6.1	0.23
983.5	968.5	10.2	105		0.5	12.1	-0.81	5.9	0.16
984.5	969.5	10.1	130		0.57	10.2	-0.73	6	0.17
986.15	971.06	10	92		0.53	12	-0.7	6	0.2
987.15	972	10.2	12		0.41	10.7	-0.73	6	0.22
997.8	981.91	10	59		0.22	10.6	-0.71	6	0.18
999.8	983.8	10.1	67		0.22	10.7	-0.65	6.1	0.22
1003.8	987.5	10	1213		0.41	7.8	-0.79	5.9	0.16
1008.05	991.4	9.7	651		0.41	9.9	-0.84	5.8	0.15
1008.35	991.7	10.2	13		0.15	6.5	-1.06	5.5	0.08
1008.75	992.1	10.3	441		0.44	8.3	-0.79	5.9	0.11
1011.3	994.5	10.1	281		0.33	8.3	-0.85	5.8	0.13
1014.3	997.3	10.2	24		0.12	6.9	-0.74	6	0.18
1064	1037.7	9.5	146		0.42	10.7	-0.59	6.2	0.37
1067	1040	10.1	17		0.56	13.5	-0.66	6.1	0.27
1073	1044.62	10	37		0.43	11.3	-0.6	6.2	0.21
1076	1046.92	10.1	201		0.43	13.2	-0.62	6.2	0.18
1079	1049.23	10.1	278		0.52	12.2	-0.53	6.3	0.19
1082	1051.54	10.2	637		0.55	8.5	-0.79	5.9	0.15
1084	1053.08	9.9	430		0.61	8.6	-0.83	5.8	0.14
1085	1053.85	10.2	335		0.54	12	-0.63	6.1	0.16
1086	1054.62	9.9	134		0.49	9.5	-0.67	6.1	0.16
1088	1056.15	9.4	498		0.51	10.2	-0.68	6.1	0.15
1089.9	1057.62	10.2	96		0.5	11.1	-0.6	6.2	0.17

## Sheet: Stable isotopes
Depth splice (mbsl)	Age (Ma)	d 13C/12C Mean	d 18O/16O Mean
893	2.391	-2.07967	4.205
893.95	2.3923	-1.948	4.059
894.8	2.3934	-3.509	4.564
900	2.4003	-2.15433	3.964
901	2.4017	-1.512	4.056
901.55	2.4024	-1.509	3.532
902	2.403	-2.01067	3.424
903	2.4043	-1.38267	3.37
904	2.4057	-1.204	1.832
905.26	2.4074	-1.08733	3.364
906.94	2.41	-1.55333	2.162
907.46	2.4108	-1.013	3.56
907.5	2.4108	-0.755	2.739
907.8	2.4113	-0.893333	2.051
908.28	2.412	-0.75	2.904
908.67	2.4126	-1.01867	3.249
908.966	2.4131	-0.226	2.886
909.13	2.4134	-1.09867	3.51133
909.526	2.414	-1.067	2.791
909.83	2.4144	-0.870667	2.885
911.061	2.4163	-0.937	2.844
911.33	2.4167	-0.586	2.933
917.55	2.4263	-1.37767	2.60333
918.15	2.4271	-1.24	3.018
918.15	2.4271	-1.62656	2.44533
939	2.4434	-1.43233	3.284
953.11	2.4572	-0.998556	2.75633
954.14	2.4589	-0.683	3.012
954.25	2.4591	-0.546	3.217
954.55	2.4596	-0.701667	2.81183
955.3	2.4608	-0.666	3.03
955.55	2.4613	-0.887667	3.108
955.82	2.4617	-1.029	3.17583
956	2.462	-0.322667	2.91683
956.4	2.4627	-0.805667	3.149
956.8	2.4633	-1.394	1.916
957.45	2.4644	-1.183	3.0315
958.1	2.4655	-0.938	2.667
958.45	2.4661	-1.75667	2.936
958.75	2.4666	-1.58767	3.073
959.45	2.4678	-2.049	2.854
960.45	2.4694	-1.412	3.07683
960.85	2.4701	-1.58567	2.93883
960.94	2.4702	-1.51	3.141
961.1	2.4705	-1.50333	3.361
961.4	2.471	-1.44656	2.90533
961.8	2.4717	-2.11467	3.546
962.1	2.4722	-1.737	3.5465
962.8	2.4733	-1.708	3.731
963.1	2.4738	-1.315	3.943
963.3	2.4742	-1.77967	3.639
963.85	2.4751	-1.98067	3.66833
972.88	2.4837	-1.866	3.917
973.26	2.484	-1.174	3.677
